# Supplementary material
Source: publisher site journal article supplement (https://www.spandidos-publications.com/2181/downloadSupplementary)
Supplement: Supplementary file 1 [file downloadSupplementary]

## Sheet: MIAup Darkorange and Blue
Table SII. DAVID GO and KEGG analysis of the affected genes by low-concentration statins in MiaPaCa2 cells, including upregulated and downregulated genes.
Category	Term	Count	%	PValue	Genes	List Total	Pop Hits	Pop Total	Fold Enrichment	Bonferroni	Benjamini	FDR
KEGG_PATHWAY	hsa01130:Biosynthesis of antibiotics	58	3.2348	3.76163e-13	TM7SF2, LDHA, AMT, OGDHL, PGAM1, PDHB, CMBL, CAT, HADH, SUCLA2, BPNT1, ACAA2, ACADM, PFKL, SUCLG2, ACO1, PFKP, PFKM, PGM2, NME4, NME2, ALDH7A1, DLD, PGM1, TGDS, PCYOX1, UGP2, ALDOA, BCAT2, ALDOC, ADH5, ECHS1, HK1, ACAT1, TPI1, ISYNA1, ENO2, IDH2, ZMPSTE24, GAPDH, FH, SHMT1, UAP1, ACY1, RPEL1, BCKDHB, AK2, UAP1L1, DLAT, AK4, AMPD2, GPI, DBT, RPE, SDHC, SDHD, PGK1, PAICS	674	212	6879	2.79227	1.06825e-10	1.06825e-10	4.98435e-10
KEGG_PATHWAY	hsa01100:Metabolic pathways	192	10.7083	3.82825e-13	LDHA, IMPAD1, GNPDA2, PGAM1, NDUFAB1, GGT1, PI4K2B, COX5B, PDHB, CMBL, PRIM1, IDS, PIK3C3, PHOSPHO2, RPN2, HADH, GPT2, DDOST, BPNT1, HMGCL, NANP, ACAA2, CRLS1, C1GALT1C1, SUCLG2, PDXP, CHPT1, LPCAT4, NME4, PGM2, NME2, CHPF, DLD, PGM1, ATP5C1, ALDOA, ACADSB, ALDOC, COX7B, HSD17B12, CERS6, PPT1, ACAT1, G6PC3, CMPK1, ADA, TPI1, ISYNA1, CERS1, UPRT, POLE2, B3GNT4, GALC, IDH2, GALE, GAD1, FH, UAP1, MO…	674	1219	6879	1.60754	1.08717e-10	5.43583e-11	5.07261e-10
KEGG_PATHWAY	hsa01200:Carbon metabolism	34	1.89626	4.15071e-09	ALDOA, AMT, ALDOC, OGDHL, PGAM1, ADH5, HK1, ECHS1, ACAT1, PDHB, TPI1, IDH2, ENO2, CAT, SUCLA2, GPT2, GAPDH, FH, SHMT1, ACADM, PFKL, RPEL1, ACO1, SUCLG2, PFKP, PFKM, DLAT, GPI, RPE, H6PD, SDHC, DLD, SDHD, PGK1	674	113	6879	3.0709	1.1788e-06	3.92933e-07	5.50022e-06
KEGG_PATHWAY	hsa00010:Glycolysis / Gluconeogenesis	21	1.17122	3.36359e-06	ALDOA, LDHA, PFKL, ALDOC, PFKP, PGAM1, ADH5, HK1, PFKM, DLAT, G6PC3, PDHB, PGM2, GPI, TPI1, ALDH7A1, PGM1, DLD, ENO2, PGK1, GAPDH	674	67	6879	3.19897	0.000954806	0.000238787	0.0044571
KEGG_PATHWAY	hsa05012:Parkinson's disease	33	1.84049	4.55713e-06	NDUFB3, UQCRC2, NDUFB4, NDUFB6, GNAI2, NDUFB8, UBE2G2, COX7B, NDUFAB1, ATP5G1, UQCRQ, ATP5G3, COX5B, NDUFS5, ATP5O, PRKACA, NDUFS2, ATP5J, NDUFA5, NDUFA2, NDUFB10, SLC25A4, UBE2L6, NDUFC1, VDAC3, NDUFA12, VDAC1, UQCRHL, UQCRH, SDHC, SDHD, ATP5C1, ATP5A1	674	142	6879	2.37187	0.00129339	0.000258812	0.00603861
KEGG_PATHWAY	hsa00190:Oxidative phosphorylation	30	1.67317	2.47915e-05	NDUFB3, UQCRC2, NDUFB4, COX11, NDUFB6, NDUFB8, COX7B, NDUFAB1, ATP5G1, UQCRQ, ATP5G3, COX5B, NDUFS5, ATP5O, NDUFS2, COX15, ATP5J, NDUFA5, NDUFA2, NDUFB10, NDUFC1, PPA2, NDUFA12, UQCRHL, PPA1, UQCRH, SDHC, SDHD, ATP5C1, ATP5A1	674	133	6879	2.30216	0.00701613	0.00117279	0.0328469
KEGG_PATHWAY	hsa05010:Alzheimer's disease	35	1.95204	2.70309e-05	UQCRC2, NDUFB3, NDUFB4, NDUFB6, NDUFB8, COX7B, NDUFAB1, ATP5G1, UQCRQ, ATP5G3, COX5B, NDUFS5, PLCB3, CASP8, PPP3CB, ATP5O, NDUFS2, GAPDH, ATP5J, NDUFA5, NDUFA2, NDUFB10, ADAM10, NDUFC1, NDUFA12, NAE1, UQCRHL, UQCRH, BACE2, SDHC, SDHD, ATP5C1, CALM3, ATP5A1, CALM1	674	168	6879	2.1263	0.00764748	0.00109609	0.0358135
KEGG_PATHWAY	hsa05016:Huntington's disease	38	2.11935	3.74156e-05	UQCRC2, POLR2H, NDUFB3, NDUFB4, NDUFB6, POLR2L, NDUFB8, AP2S1, COX7B, NDUFAB1, ATP5G1, UQCRQ, ATP5G3, COX5B, NDUFS5, PLCB3, CASP8, DLG4, ATP5O, NDUFS2, HAP1, ATP5J, NDUFA5, NDUFA2, NDUFB10, SLC25A4, NDUFC1, SOD1, VDAC3, NDUFA12, VDAC1, UQCRHL, HDAC1, UQCRH, SDHC, SDHD, ATP5C1, ATP5A1	674	192	6879	2.01998	0.01057	0.0013274	0.0495691
KEGG_PATHWAY	hsa01230:Biosynthesis of amino acids	20	1.11545	4.11058e-05	ALDOA, SHMT1, ACY1, ALDH18A1, BCAT2, PFKL, RPEL1, MAT2A, ACO1, ALDOC, PGAM1, PFKP, PFKM, RPE, TPI1, ENO2, IDH2, PGK1, GAPDH, GPT2	674	72	6879	2.83506	0.0116064	0.0012963	0.0544568
KEGG_PATHWAY	hsa00052:Galactose metabolism	12	0.669269	6.94343e-05	PGM2, GALK1, PFKL, PGM1, GAA, PFKP, HK1, GALE, PFKM, G6PC3, UGP2, GLB1	674	30	6879	4.08249	0.0195269	0.00197006	0.0919703
KEGG_PATHWAY	hsa03420:Nucleotide excision repair	15	0.836587	0.000102321	LIG1, GTF2H3, CETN2, GTF2H5, RBX1, RPA3, RPA1, XPA, ERCC6, RFC1, POLE2, POLD1, DDB2, CUL4B, ERCC1	674	47	6879	3.25731	0.0286424	0.00263838	0.135503
KEGG_PATHWAY	hsa01212:Fatty acid metabolism	15	0.836587	0.00013168	ACAA2, ACADSB, CPT2, ACADM, SCD, MCAT, HSD17B12, ECHS1, PPT1, ACAT1, TECR, ACADVL, PECR, SCD5, HADH	674	48	6879	3.18945	0.0367089	0.00311179	0.174353
KEGG_PATHWAY	hsa00030:Pentose phosphate pathway	11	0.613497	0.000267735	ALDOA, PGM2, GPI, RPE, PFKL, RPEL1, H6PD, ALDOC, PGM1, PFKP, PFKM	674	29	6879	3.87133	0.0732272	0.00583268	0.354202
KEGG_PATHWAY	hsa00020:Citrate cycle (TCA cycle)	11	0.613497	0.000366885	ACO1, SUCLG2, SDHC, OGDHL, DLD, SDHD, IDH2, DLAT, SUCLA2, PDHB, FH	674	30	6879	3.74228	0.0989679	0.00741625	0.485079
KEGG_PATHWAY	hsa00051:Fructose and mannose metabolism	11	0.613497	0.000657631	ALDOA, TPI1, MPI, PFKL, PFKFB4, PFKFB3, ALDOC, PFKP, HK1, PFKM, ENOSF1	674	32	6879	3.50839	0.170414	0.012378	0.867944
KEGG_PATHWAY	hsa04146:Peroxisome	19	1.05968	0.000901294	ACOX2, ECI2, NUDT19, EPHX2, PEX5, PEX3, SOD1, PHYH, PRDX1, PEX11A, PECR, DHRS4, PEX19, PEX2, IDH2, ABCD3, CAT, SCP2, HMGCL	674	83	6879	2.33637	0.225922	0.0158778	1.18776
KEGG_PATHWAY	hsa00280:Valine, leucine and isoleucine degradation	13	0.725042	0.00146026	ACAA2, ACADSB, ACADM, BCAT2, BCKDHB, ECHS1, ACAT1, DBT, MCCC2, ALDH7A1, DLD, HADH, HMGCL	674	47	6879	2.823	0.339672	0.0241172	1.91782
KEGG_PATHWAY	hsa00500:Starch and sucrose metabolism	10	0.557724	0.00348172	PGM2, GPI, GBE1, PYGL, PGM1, GYS1, GAA, HK1, G6PC3, UGP2	674	33	6879	3.0928	0.628622	0.0535429	4.5166
KEGG_PATHWAY	hsa00520:Amino sugar and nucleotide sugar metabolism	12	0.669269	0.00561473	PGM2, GALK1, GPI, UAP1, MPI, GNPDA2, PGM1, HK1, GALE, UAP1L1, NANP, UGP2	674	48	6879	2.55156	0.797917	0.0807176	7.18966
KEGG_PATHWAY	hsa00071:Fatty acid degradation	11	0.613497	0.00611601	ACADVL, ACAA2, ECI2, ALDH7A1, ACADSB, CPT2, ACADM, ADH5, ECHS1, HADH, ACAT1	674	42	6879	2.67306	0.824879	0.0834274	7.80772
KEGG_PATHWAY	hsa04142:Lysosome	22	1.22699	0.00640094	LAPTM4B, CTSZ, LIPA, AP4E1, GM2A, GUSB, AP3S1, PPT1, CD164, CTSV, GLB1, LAMP2, AP1S1, AP1S2, IDS, NAGA, GAA, GALC, CTSC, SCARB2, CTSH, GGA2	674	121	6879	1.85568	0.838574	0.0831793	8.15735
KEGG_PATHWAY	hsa04120:Ubiquitin mediated proteolysis	24	1.33854	0.00673399	ANAPC5, VHL, FBXO2, UBE2G2, SKP2, BIRC7, UBE2L6, CDC23, ANAPC11, UBE2Q2, RBX1, UBE2R2, UBE2N, FANCL, UBE2E3, PIAS3, MAP3K1, DDB2, SMURF2, PIAS2, NEDD4L, CUL4B, UBE2D1, UBE2E1	674	137	6879	1.78795	0.853235	0.0835279	8.56445
KEGG_PATHWAY	hsa03430:Mismatch repair	7	0.390407	0.0202976	RPA1, MSH6, RFC1, MSH2, LIG1, POLD1, RPA3	674	23	6879	3.10624	0.997044	0.223695	23.7945
KEGG_PATHWAY	hsa04932:Non-alcoholic fatty liver disease (NAFLD)	24	1.33854	0.0207347	SREBF1, NDUFB3, UQCRC2, NDUFA5, NDUFB4, NDUFA2, NDUFB10, NDUFB6, NDUFB8, COX7B, NDUFAB1, NDUFC1, UQCRQ, COX5B, NDUFA12, UQCRHL, CDC42, NDUFS5, UQCRH, SDHC, CASP8, RAC1, SDHD, NDUFS2	674	151	6879	1.62218	0.997396	0.219593	24.2438
KEGG_PATHWAY	hsa04910:Insulin signaling pathway	22	1.22699	0.0265637	SREBF1, MAP2K1, PTPRF, PHKA1, ELK1, HK1, PPP1CC, PPP1CB, G6PC3, PPP1R3E, PRKAR2B, NRAS, PPP1R3B, CRKL, PYGL, PRKAR1B, GYS1, CALM3, PRKACA, SH2B2, SHC1, CALM1	674	138	6879	1.62708	0.999522	0.263498	30.0062
KEGG_PATHWAY	hsa00062:Fatty acid elongation	7	0.390407	0.0301276	ACAA2, HSD17B12, ACOT2, ECHS1, PPT1, HADH, TECR	674	25	6879	2.85774	0.999831	0.28405	33.3268
KEGG_PATHWAY	hsa00620:Pyruvate metabolism	9	0.501952	0.0370418	HAGH, LDHA, ALDH7A1, DLD, GLO1, DLAT, ACAT1, PDHB, FH	674	40	6879	2.2964	0.999978	0.327682	39.3575
KEGG_PATHWAY	hsa04141:Protein processing in endoplasmic reticulum	25	1.39431	0.0390031	P4HB, SEC31B, MBTPS2, GANAB, PDIA3, UBE2G2, FBXO2, PDIA6, PDIA4, LMAN1, CALR, PRKCSH, SEC63, OS9, RBX1, NGLY1, UBE2E3, HSP90B1, EIF2AK1, RPN2, UBE2D1, SSR4, DDOST, SEC61G, UBE2E1	674	169	6879	1.5098	0.999988	0.332039	40.9739
KEGG_PATHWAY	hsa04360:Axon guidance	20	1.11545	0.0393218	ABLIM1, PLXNA3, GNAI2, PLXNB3, EFNA3, DPYSL2, ITGB1, EPHA2, CDC42, NRAS, SEMA6B, CXCR4, RAC1, SEMA4C, PPP3CB, SEMA3D, SEMA4B, SEMA3B, SEMA3A, EFNA4	674	127	6879	1.60728	0.999989	0.324875	41.2328
KEGG_PATHWAY	hsa00650:Butanoate metabolism	7	0.390407	0.0426411	L2HGDH, ALDH5A1, ECHS1, HADH, GAD1, ACAT1, HMGCL	674	27	6879	2.64606	0.999996	0.338025	43.8672
KEGG_PATHWAY	hsa00630:Glyoxylate and dicarboxylate metabolism	7	0.390407	0.0426411	SHMT1, ACO1, AMT, DLD, CAT, ACAT1, HYI	674	27	6879	2.64606	0.999996	0.338025	43.8672
KEGG_PATHWAY	hsa05230:Central carbon metabolism in cancer	12	0.669269	0.0444209	SLC16A3, PDK1, NRAS, PFKL, MAP2K1, SLC2A1, PGAM1, PFKP, HK1, PFKM, PDHB, SIRT3	674	64	6879	1.91367	0.999998	0.340497	45.2345
Category	Term	Count	%	PValue	Genes	List Total	Pop Hits	Pop Total	Fold Enrichment	Bonferroni	Benjamini	FDR
GOTERM_BP_DIRECT	GO:0006096~glycolytic process	17	0.948132	4.82983e-09	ALDOA, LDHA, PFKL, ALDOC, OGDHL, TMEM237, PGAM1, HK1, PFKM, GPI, TPI1, PGM1, ENO2, PGK1, DHTKD1, GAPDH, EDARADD	1462	34	16792	5.74282	2.04058e-05	2.04058e-05	9.02845e-06
GOTERM_BP_DIRECT	GO:0061621~canonical glycolysis	14	0.780814	5.48997e-08	ALDOA, PFKL, PFKFB4, PFKFB3, ALDOC, PGAM1, PFKP, HK1, PFKM, GPI, TPI1, ENO2, PGK1, GAPDH	1462	26	16792	6.18457	0.000231924	0.000115969	0.000102625
GOTERM_BP_DIRECT	GO:0070911~global genome nucleotide-excision repair	14	0.780814	1.1147e-06	CETN2, GTF2H3, UBE2V2, GTF2H5, RBX1, UBE2N, XPA, SUMO2, SUMO1, CHD1L, DDB2, CUL4B, PARP1, ERCC1	1462	32	16792	5.02497	0.00469854	0.00156864	0.0020837
GOTERM_BP_DIRECT	GO:0006293~nucleotide-excision repair, preincision complex stabilization	11	0.613497	3.47516e-06	RPA1, XPA, CHD1L, DDB2, GTF2H3, CUL4B, GTF2H5, PARP1, ERCC1, RBX1, RPA3	1462	21	16792	6.01629	0.0145753	0.00366392	0.00649597
GOTERM_BP_DIRECT	GO:0006295~nucleotide-excision repair, DNA incision, 3'-to lesion	11	0.613497	9.58287e-06	RPA1, XPA, CHD1L, DDB2, GTF2H3, CUL4B, GTF2H5, PARP1, ERCC1, RBX1, RPA3	1462	23	16792	5.49313	0.0396791	0.00806487	0.0179119
GOTERM_BP_DIRECT	GO:0006099~tricarboxylic acid cycle	12	0.669269	1.64955e-05	ACO1, SUCLG2, SDHC, OGDHL, DLD, SDHD, IDH2, DLAT, DHTKD1, SUCLA2, PDHB, FH	1462	29	16792	4.75268	0.067321	0.0115485	0.0308308
GOTERM_BP_DIRECT	GO:0061077~chaperone-mediated protein folding	13	0.725042	4.24809e-05	FKBP9, FKBP8, FKBP3, FKBP1A, PDIA4, CALR, FKBP1C, TRAP1, P3H1, PEX19, PPIB, FKBP10, FKBP2	1462	37	16792	4.03549	0.1643	0.0253149	0.0793803
GOTERM_BP_DIRECT	GO:0006296~nucleotide-excision repair, DNA incision, 5'-to lesion	13	0.725042	4.24809e-05	RPA1, XPA, CHD1L, RFC1, POLD1, DDB2, GTF2H3, CUL4B, GTF2H5, PARP1, ERCC1, RBX1, RPA3	1462	37	16792	4.03549	0.1643	0.0253149	0.0793803
GOTERM_BP_DIRECT	GO:0033683~nucleotide-excision repair, DNA incision	13	0.725042	5.72047e-05	RPA1, XPA, CHD1L, RFC1, POLD1, DDB2, GTF2H3, CUL4B, GTF2H5, PARP1, ERCC1, RBX1, RPA3	1462	38	16792	3.9293	0.214706	0.0297603	0.106879
GOTERM_BP_DIRECT	GO:0006635~fatty acid beta-oxidation	14	0.780814	6.18563e-05	ACOX2, ECI2, ACAA2, CPT2, ACADM, ECHS1, PEX5, DECR1, ACAT1, ACADVL, PEX2, ABCD3, ACAD11, HADH	1462	44	16792	3.65452	0.229989	0.0286214	0.115566
GOTERM_BP_DIRECT	GO:0006294~nucleotide-excision repair, preincision complex assembly	11	0.613497	0.000103253	RPA1, XPA, CHD1L, DDB2, GTF2H3, CETN2, CUL4B, GTF2H5, PARP1, RBX1, RPA3	1462	29	16792	4.35662	0.353555	0.0426887	0.192836
GOTERM_BP_DIRECT	GO:0006120~mitochondrial electron transport, NADH to ubiquinone	14	0.780814	0.000207476	NDUFB3, NDUFA5, NDUFB4, NDUFA2, NDUFB6, NDUFB10, NDUFB8, NDUFAB1, COQ9, NDUFC1, NDUFA12, NDUFS5, DLD, NDUFS2	1462	49	16792	3.28161	0.583837	0.0766048	0.387127
GOTERM_BP_DIRECT	GO:0060271~cilium morphogenesis	26	1.45008	0.000261826	BBS5, STK36, B9D1, TMEM237, SPAG16, FUZ, OFD1, NPHP3, RILPL2, DYNLL1, GSN, TCTN1, TCTN2, TMEM107, CCDC28B, UNC119B, ARL6, FLNA, ARL3, C5ORF30, TMEM67, ICK, HSPB11, C21ORF2, IFT172, IFT81	1462	136	16792	2.19578	0.669239	0.0880741	0.488302
GOTERM_BP_DIRECT	GO:0006094~gluconeogenesis	13	0.725042	0.000272913	ALDOA, GPI, TPI1, SLC25A10, ALDOC, PGM1, ENO2, PER2, PGAM1, SLC25A1, PGK1, GAPDH, G6PC3	1462	44	16792	3.39348	0.684379	0.084888	0.508929
GOTERM_BP_DIRECT	GO:0000717~nucleotide-excision repair, DNA duplex unwinding	9	0.501952	0.000338999	XPA, CHD1L, DDB2, GTF2H3, CETN2, CUL4B, GTF2H5, PARP1, RBX1	1462	22	16792	4.69867	0.761292	0.0972615	0.631798
GOTERM_BP_DIRECT	GO:0033539~fatty acid beta-oxidation using acyl-CoA dehydrogenase	8	0.44618	0.00050105	ACADVL, ACOX2, ACADSB, ACADM, ACAD11, ACAD9, ETFB, ETFA	1462	18	16792	5.10473	0.879664	0.131653	0.932478
GOTERM_BP_DIRECT	GO:0006283~transcription-coupled nucleotide-excision repair	17	0.948132	0.000522333	POLR2H, HMGN1, COPS2, POLR2L, LIG1, GTF2H3, GTF2H5, COPS8, RBX1, RPA3, RPA1, XPA, ERCC6, RFC1, POLD1, CUL4B, ERCC1	1462	74	16792	2.63859	0.890017	0.12887	0.971904
GOTERM_BP_DIRECT	GO:0009083~branched-chain amino acid catabolic process	8	0.44618	0.000734087	MCCC2, DBT, ACADSB, BCKDK, BCAT2, DLD, BCKDHB, ACAT1	1462	19	16792	4.83606	0.95507	0.166823	1.36336
GOTERM_BP_DIRECT	GO:0045454~cell redox homeostasis	17	0.948132	0.00082834	P4HB, TMX1, GLRX5, PDIA3, PRDX4, PDIA6, PRDX2, PDIA4, PRDX3, PRDX1, TXNDC12, CYBA, NXN, PRDX6, DLD, QSOX2, QSOX1	1462	77	16792	2.53579	0.969838	0.176762	1.53713
GOTERM_BP_DIRECT	GO:0055114~oxidation-reduction process	75	4.18293	0.000939667	C15ORF48, TM7SF2, LDHA, PDIA3, PRDX4, HR, PRDX2, PRDX1, KDM1A, PECR, P4HA2, PLOD1, PLOD2, P4HA1, AKR7A2, VKORC1, ASPH, SCD5, LOXL2, KDM5B, HIGD1A, COX15, ACADM, CYB5B, TECR, SCCPDH, ALDH7A1, DHRS3, DHRS4, KDM2B, PRDX6, UQCRH, H6PD, ZADH2, PCYOX1, HSD17B11, CYP2U1, TMX1, PAM, GLRX5, ALDH18A1, HSD3B7, HSD17B1, HSD17B12, DHRS4L2, IFI30, EGLN1, SESN1, ALDH1A1, P3H1, CBR1, P3H3, KDM3A, QSOX2, QSOX1, P…	1462	592	16792	1.45511	0.981164	0.188646	1.74201
GOTERM_BP_DIRECT	GO:0046487~glyoxylate metabolic process	9	0.501952	0.00120914	DBT, AMT, DLD, BCKDHB, NDUFAB1, DLAT, DHTKD1, PDHX, PDHB	1462	26	16792	3.9758	0.993974	0.225538	2.23625
GOTERM_BP_DIRECT	GO:1900026~positive regulation of substrate adhesion-dependent cell spreading	10	0.557724	0.00123737	CDC42, TRIOBP, CRKL, RAC1, S100A10, CALR, MYADM, FLNA, CIB1, NET1	1462	32	16792	3.58926	0.994652	0.220498	2.28788
GOTERM_BP_DIRECT	GO:0071480~cellular response to gamma radiation	8	0.44618	0.00145101	KDM1A, CYBA, TMEM109, XRCC6, ELK1, CHEK2, YAP1, GTF2H5	1462	21	16792	4.37548	0.997834	0.243356	2.67786
GOTERM_BP_DIRECT	GO:0005980~glycogen catabolic process	8	0.44618	0.00145101	PGM2, PYGL, PGM1, PHKA1, GAA, CALM3, PFKM, CALM1	1462	21	16792	4.37548	0.997834	0.243356	2.67786
GOTERM_BP_DIRECT	GO:0071526~semaphorin-plexin signaling pathway	10	0.557724	0.00157174	PLXNA3, SEMA6B, RAC1, PLXNB3, SEMA3D, SEMA4C, SEMA4B, SEMA3B, SEMA3A, FLNA	1462	33	16792	3.4805	0.998701	0.250949	2.89757
GOTERM_BP_DIRECT	GO:0019388~galactose catabolic process	5	0.278862	0.00161129	PGM2, GALK1, PGM1, GALE, GLB1	1462	7	16792	8.20403	0.998901	0.247146	2.96946
GOTERM_BP_DIRECT	GO:0006457~protein folding	29	1.6174	0.0018242	FKBP9, TMX1, FKBP8, GANAB, PDIA3, GNAI2, VBP1, PDIA6, FKBP1A, PDIA4, LMAN1, CALR, PRKCSH, P3H1, MPDU1, HSPE1, QSOX2, DNAJC19, LRPAP1, ST13, TRAP1, PPIH, HSP90B1, HSP90B2P, MLEC, TBCD, GNB3, FKBP10, FKBP2	1462	180	16792	1.85046	0.999554	0.265505	3.35553
GOTERM_BP_DIRECT	GO:0006090~pyruvate metabolic process	8	0.44618	0.00196995	HAGH, SLC16A3, LDHA, DLD, GLO1, DLAT, PDHX, PDHB	1462	22	16792	4.17659	0.999759	0.274165	3.61898
GOTERM_BP_DIRECT	GO:0005975~carbohydrate metabolic process	28	1.56163	0.00225822	LDHA, GANAB, GNPDA2, SLC35A1, HEXDC, GLB1, SIAE, SLC2A3, HPSE, NAGA, IDH2, GALC, AKR7A2, GLO1, NANP, GUSB, PGM2, GPI, RPE, B3GAT3, MPI, CHID1, PYGL, MLEC, PGM1, GAA, GLB1L2, DPM3	1462	174	16792	1.84826	0.999929	0.297964	4.13805
GOTERM_BP_DIRECT	GO:0000002~mitochondrial genome maintenance	6	0.334635	0.00232948	MEF2A, LONP1, SLC25A4, SLC25A36, MRPL17, MRPL39	1462	12	16792	5.74282	0.999947	0.296658	4.26594
GOTERM_BP_DIRECT	GO:0010510~regulation of acetyl-CoA biosynthetic process from pyruvate	6	0.334635	0.00232948	PDK1, PDK3, DLD, DLAT, PDHX, PDHB	1462	12	16792	5.74282	0.999947	0.296658	4.26594
GOTERM_BP_DIRECT	GO:0000715~nucleotide-excision repair, DNA damage recognition	8	0.44618	0.00262163	XPA, COPS2, DDB2, CETN2, COPS8, CUL4B, PARP1, RBX1	1462	23	16792	3.995	0.999985	0.317809	4.78863
GOTERM_BP_DIRECT	GO:0010952~positive regulation of peptidase activity	6	0.334635	0.00351617	CAV1, FBLN1, MAPK12, CTSH, PCOLCE, PCOLCE2	1462	13	16792	5.30106	1	0.391079	6.37231
GOTERM_BP_DIRECT	GO:0048843~negative regulation of axon extension involved in axon guidance	8	0.44618	0.00558571	PLXNA3, SEMA6B, RYK, SEMA3D, SEMA4C, SEMA4B, SEMA3B, SEMA3A	1462	26	16792	3.53404	1	0.533927	9.94117
GOTERM_BP_DIRECT	GO:0008152~metabolic process	26	1.45008	0.00559736	BCAT2, ACAT1, GLB1, GSTM1, GSTM3, AGPAT5, IDS, GALC, SUCLA2, PDHX, AASDH, ENOSF1, ACAA2, ECI2, GSTA4, NCEH1, SUCLG2, ACO1, MCAT, BCKDHB, EPHX2, UAP1L1, LPCAT4, DBT, SCP2, UGP2	1462	168	16792	1.77754	1	0.523412	9.96089
GOTERM_BP_DIRECT	GO:0009060~aerobic respiration	9	0.501952	0.00622146	UQCRC2, COX11, UQCRH, SDHC, COX20, CAT, MTFR1L, SIRT3, UQCRHL	1462	33	16792	3.13245	1	0.550232	11.0114
GOTERM_BP_DIRECT	GO:0032981~mitochondrial respiratory chain complex I assembly	13	0.725042	0.00741718	NDUFB3, NDUFA5, NDUFB4, NDUFA2, NDUFB6, NDUFB10, NDUFB8, NDUFAB1, NDUFC1, NDUFA12, NDUFS5, ACAD9, NDUFS2	1462	63	16792	2.37005	1	0.60352	12.9917
GOTERM_BP_DIRECT	GO:0042776~mitochondrial ATP synthesis coupled proton transport	7	0.390407	0.00743255	ATP5C1, ATP5O, ATP5A1, ATP5G1, COX5B, ATP5G3, ATP5J	1462	21	16792	3.82855	1	0.593661	13.0169
GOTERM_BP_DIRECT	GO:0002576~platelet degranulation	18	1.0039	0.00743265	ALDOA, LYN, SPARC, SOD1, APLP2, FLNA, VCL, VEGFB, VEGFC, LGALS3BP, LAMP2, SERPINE1, SERPINA3, CALM3, TMSB4X, QSOX1, PROS1, CALM1	1462	103	16792	2.0072	1	0.583372	13.0171
GOTERM_BP_DIRECT	GO:0006289~nucleotide-excision repair	10	0.557724	0.00759929	RPA1, XPA, NEIL2, NEIL1, DDB2, GTF2H3, CETN2, GTF2H5, ERCC1, RPA3	1462	41	16792	2.80137	1	0.581497	13.2897
GOTERM_BP_DIRECT	GO:0010038~response to metal ion	5	0.278862	0.00781254	MT1A, MT2A, NDRG1, NEDD4L, MT1X	1462	10	16792	5.74282	1	0.581903	13.6373
GOTERM_BP_DIRECT	GO:0001570~vasculogenesis	12	0.669269	0.00802925	SMO, CAV1, ADM, EGFL7, AGGF1, MYO1E, GLMN, YAP1, FZD4, EPHA2, SHH, CITED2	1462	56	16792	2.46121	1	0.582448	13.9892
GOTERM_BP_DIRECT	GO:0042073~intraciliary transport	6	0.334635	0.00957511	ICK, HSPB11, TTC30A, TTC30B, IFT81, ARL3	1462	16	16792	4.30711	1	0.638048	16.4605
GOTERM_BP_DIRECT	GO:0048538~thymus development	10	0.557724	0.0104583	CRKL, HOXA3, MAP2K1, JARID2, SIX1, SOD1, ZBTB1, SHH, CTNNB1, CITED2	1462	43	16792	2.67108	1	0.661553	17.8421
GOTERM_BP_DIRECT	GO:0005977~glycogen metabolic process	8	0.44618	0.0105367	PPP1R3E, GBE1, PPP1R3B, PYGL, PHKA1, PPP1CC, PPP1CB, UGP2	1462	29	16792	3.16845	1	0.655466	17.9637
GOTERM_BP_DIRECT	GO:0006754~ATP biosynthetic process	8	0.44618	0.0105367	ALDOA, UQCC3, ATP5C1, ATP5O, ATP5A1, ATP5G1, ATP5G3, ATP5J	1462	29	16792	3.16845	1	0.655466	17.9637
GOTERM_BP_DIRECT	GO:0042384~cilium assembly	20	1.11545	0.0107296	ABLIM1, BBS5, STK36, B9D1, TMEM237, ARL6, FLNA, FUZ, SPAG16, TMEM67, ICK, TRIM59, FNBP1L, TTC30A, TTC30B, IFT172, IFT81, TCTN2, TMEM107, CCDC28B	1462	124	16792	1.85252	1	0.653524	18.2622
GOTERM_BP_DIRECT	GO:0042769~DNA damage response, detection of DNA damage	9	0.501952	0.0107464	RPA1, RFC1, POLD1, USP1, CUL4B, PARP1, RPS3, RBX1, RPA3	1462	36	16792	2.87141	1	0.645655	18.2881
GOTERM_BP_DIRECT	GO:0060789~hair follicle placode formation	4	0.22309	0.010753	CDC42, HDAC1, GNAS, CTNNB1	1462	6	16792	7.65709	1	0.637617	18.2983
GOTERM_BP_DIRECT	GO:0018406~protein C-linked glycosylation via 2'-alpha-mannosyl-L-tryptophan	4	0.22309	0.010753	DPY19L2P2, DPM3, DPY19L4, DPY19L1	1462	6	16792	7.65709	1	0.637617	18.2983
GOTERM_BP_DIRECT	GO:0070914~UV-damage excision repair	5	0.278862	0.0114407	XPA, MC1R, DDB2, CUL4B, ERCC1	1462	11	16792	5.22074	1	0.652456	19.3536
GOTERM_BP_DIRECT	GO:0006006~glucose metabolic process	13	0.725042	0.012097	PGM2, PDK1, NISCH, GNPDA2, ALDH5A1, H6PD, PDK3, PGM1, GAA, DLAT, BRAT1, GAPDH, PDHB	1462	67	16792	2.22856	1	0.66515	20.3485
GOTERM_BP_DIRECT	GO:0071276~cellular response to cadmium ion	6	0.334635	0.0126097	SUMO1, MT1A, MT1E, SOD1, MT1X, PPP5C	1462	17	16792	4.05375	1	0.672731	21.1177
GOTERM_BP_DIRECT	GO:0070125~mitochondrial translational elongation	15	0.836587	0.0145563	TUFM, MRPS27, MRPL1, MRPS34, MRPL42, MRPS14, CHCHD1, MRPS25, MRPL11, MRPL13, GADD45GIP1, MRPL17, MRPL16, MRPL19, MRPL39	1462	85	16792	2.02688	1	0.717574	23.9747
GOTERM_BP_DIRECT	GO:0045880~positive regulation of smoothened signaling pathway	7	0.390407	0.014727	SHOX2, SMO, SFRP1, STK36, IFT172, CHSY1, SHH	1462	24	16792	3.34998	1	0.71455	24.2204
GOTERM_BP_DIRECT	GO:0007031~peroxisome organization	6	0.334635	0.0162336	PEX11A, PEX19, PEX2, ABCD3, PEX3, SCP2	1462	18	16792	3.82855	1	0.742279	26.3574
GOTERM_BP_DIRECT	GO:0030336~negative regulation of cell migration	16	0.892359	0.0169045	RAP2A, NOG, BST2, IFITM1, PLXNB3, ZMYND8, SHH, CITED2, VCL, FUZ, ARHGAP4, NISCH, SFRP1, SERPINE1, CNN2, STC1	1462	95	16792	1.93442	1	0.749735	27.2906
GOTERM_BP_DIRECT	GO:0007223~Wnt signaling pathway, calcium modulating pathway	9	0.501952	0.0173347	MAP3K7, MOV10, PLCB3, PPP3CB, AGO1, CALM3, FZD4, CTNNB1, CALM1	1462	39	16792	2.65053	1	0.751916	27.8831
GOTERM_BP_DIRECT	GO:0015949~nucleobase-containing small molecule interconversion	7	0.390407	0.0179859	NME4, NME2, NUDT13, AK2, AK4, GUK1, CMPK1	1462	25	16792	3.21598	1	0.758295	28.7712
GOTERM_BP_DIRECT	GO:0008630~intrinsic apoptotic signaling pathway in response to DNA damage	10	0.557724	0.018497	XPA, MSH6, TNFRSF1B, ERCC6, MCL1, BOK, BCL2L2, CHEK2, CASP2, EPHA2	1462	47	16792	2.44375	1	0.761696	29.4609
GOTERM_BP_DIRECT	GO:0034436~glycoprotein transport	3	0.167317	0.021381	GUK1, ABCG1, VLDLR	1462	3	16792	11.4856	1	0.804191	33.2364
GOTERM_BP_DIRECT	GO:0021678~third ventricle development	3	0.167317	0.021381	KDM2B, DPCD, MYH10	1462	3	16792	11.4856	1	0.804191	33.2364
GOTERM_BP_DIRECT	GO:0007228~positive regulation of hh target transcription factor activity	3	0.167317	0.021381	SMO, STK36, SHH	1462	3	16792	11.4856	1	0.804191	33.2364
GOTERM_BP_DIRECT	GO:1902166~negative regulation of intrinsic apoptotic signaling pathway in response to DNA damage by p53 class mediator	5	0.278862	0.0215431	MUC1, KDM1A, ING2, CD44, TAF9B	1462	13	16792	4.41755	1	0.800968	33.4429
GOTERM_BP_DIRECT	GO:0005978~glycogen biosynthetic process	7	0.390407	0.0217059	PGM2, GBE1, ACADM, PGM1, PER2, GYS1, UGP2	1462	26	16792	3.09229	1	0.797816	33.6496
GOTERM_BP_DIRECT	GO:0001666~response to hypoxia	24	1.33854	0.0252903	MUC1, PAM, CAV1, LDHA, NOL3, CST3, EGLN1, ADA, DDIT4, CITED2, VEGFB, VEGFC, CYBA, LONP1, HSP90B1, PLOD1, ADM, CXCR4, PLOD2, ANG, CAT, LOXL2, ALKBH5, ANGPTL4	1462	172	16792	1.60265	1	0.840281	38.0496
GOTERM_BP_DIRECT	GO:0045664~regulation of neuron differentiation	6	0.334635	0.02541	NREP, YWHAG, NTF4, SIX1, S1PR5, EOMES	1462	20	16792	3.44569	1	0.836741	38.1917
GOTERM_BP_DIRECT	GO:0051451~myoblast migration	4	0.22309	0.0263742	SMO, ITGB1BP1, SIX1, NET1	1462	8	16792	5.74282	1	0.842961	39.3248
GOTERM_BP_DIRECT	GO:0060348~bone development	9	0.501952	0.0264143	P3H1, SMAD9, PPIB, HSD17B1, IFT172, VKORC1, STC1, GNAS, SPARC	1462	42	16792	2.46121	1	0.838655	39.3715
GOTERM_BP_DIRECT	GO:0072001~renal system development	5	0.278862	0.0281278	SMO, ITGB4, PRKCSH, SEC63, SHH	1462	14	16792	4.10201	1	0.85242	41.3353
GOTERM_BP_DIRECT	GO:0006744~ubiquinone biosynthetic process	5	0.278862	0.0281278	COQ3, COQ2, COQ10A, COQ9, PDSS2	1462	14	16792	4.10201	1	0.85242	41.3353
GOTERM_BP_DIRECT	GO:0006807~nitrogen compound metabolic process	5	0.278862	0.0281278	MYO1E, NADSYN1, PKD1, PRKCSH, SEC63	1462	14	16792	4.10201	1	0.85242	41.3353
GOTERM_BP_DIRECT	GO:0006284~base-excision repair	8	0.44618	0.0288021	RPA1, XPA, MPG, ERCC6, LIG1, NEIL2, NEIL1, RPA3	1462	35	16792	2.62529	1	0.854752	42.0916
GOTERM_BP_DIRECT	GO:0007596~blood coagulation	25	1.39431	0.0295421	GGCX, F2RL2, HPS5, F2RL1, LMAN1, SHH, BLOC1S6, PRKAR2B, CDC42, KDM1A, RAC1, VKORC1, PRKACA, SH2B2, EHD2, ANO6, DOCK11, LYN, MAFK, P2RX6, HDAC1, PRKAR1B, COL1A2, PROS1, F2R	1462	184	16792	1.56055	1	0.857608	42.9108
GOTERM_BP_DIRECT	GO:0000082~G1/S transition of mitotic cell cycle	16	0.892359	0.0303511	CDC7, SKP2, RB1, PIM2, CDK4, ITGB1, RPA3, PRIM1, CCNE2, RPA1, DHFR, PLK2, POLE2, CDKN2C, ORC4, DHFRP1	1462	102	16792	1.80167	1	0.860964	43.7939
GOTERM_BP_DIRECT	GO:0070126~mitochondrial translational termination	14	0.780814	0.0344407	MRPS27, MRPL11, MRPL1, MRPL13, MRPL42, MRPS34, GADD45GIP1, MRPS14, CHCHD1, MRPS25, MRPL17, MRPL16, MRPL19, MRPL39	1462	86	16792	1.86975	1	0.890311	48.0637
GOTERM_BP_DIRECT	GO:0016311~dephosphorylation	14	0.780814	0.0344407	IMPAD1, PFKFB4, SGPP1, PFKFB3, EPHX2, LPIN2, G6PC3, LPIN3, NT5DC1, PHOSPHO2, PPP3CB, NT5E, BPNT1, NANP	1462	86	16792	1.86975	1	0.890311	48.0637
GOTERM_BP_DIRECT	GO:0006122~mitochondrial electron transport, ubiquinol to cytochrome c	5	0.278862	0.0357805	UQCRC2, UQCC3, UQCRH, UQCRQ, UQCRHL	1462	15	16792	3.82855	1	0.896053	49.3944
GOTERM_BP_DIRECT	GO:0034101~erythrocyte homeostasis	4	0.22309	0.0370457	GPI, HOXB6, PRDX1, RPS24	1462	9	16792	5.10473	1	0.900884	50.6214
GOTERM_BP_DIRECT	GO:0035456~response to interferon-beta	4	0.22309	0.0370457	BST2, IFITM1, IFITM2, IFITM3	1462	9	16792	5.10473	1	0.900884	50.6214
GOTERM_BP_DIRECT	GO:0003254~regulation of membrane depolarization	4	0.22309	0.0370457	FHL1, NEDD4L, NTSR1, B2M	1462	9	16792	5.10473	1	0.900884	50.6214
GOTERM_BP_DIRECT	GO:0070493~thrombin receptor signaling pathway	4	0.22309	0.0370457	F2RL2, F2RL1, IQGAP2, F2R	1462	9	16792	5.10473	1	0.900884	50.6214
GOTERM_BP_DIRECT	GO:0015986~ATP synthesis coupled proton transport	6	0.334635	0.0373654	ATP5C1, ATP5O, ATP5A1, ATP5G1, ATP5G3, ATP5J	1462	22	16792	3.13245	1	0.899589	50.9269
GOTERM_BP_DIRECT	GO:0040008~regulation of growth	10	0.557724	0.0377961	UBE2E3, AES, ING2, MORF4L2, SOCS6, SHC1, CSPG5, MRGBP, MCTS1, KCTD11	1462	53	16792	2.1671	1	0.899011	51.3358
GOTERM_BP_DIRECT	GO:0071363~cellular response to growth factor stimulus	9	0.501952	0.0383604	TNFRSF1B, PPP2R5B, SFRP1, SHC1, CAT, MAPK7, SPARC, CTNNB1, CIB1	1462	45	16792	2.29713	1	0.899271	51.8665
GOTERM_BP_DIRECT	GO:0071300~cellular response to retinoic acid	12	0.669269	0.0385392	MUC1, OSR1, SERPINF1, LYN, PTK6, PTK7, SNRNP70, OGT, YAP1, BRINP3, FZD4, FZD7	1462	70	16792	1.96897	1	0.897166	52.0335
GOTERM_BP_DIRECT	GO:0030855~epithelial cell differentiation	12	0.669269	0.0385392	MUC1, ACADVL, CBR1, PIH1D1, LGALS3, DNPH1, ALDOC, UPK1A, SIX1, ID3, PGK1, VDAC1	1462	70	16792	1.96897	1	0.897166	52.0335
GOTERM_BP_DIRECT	GO:0016557~peroxisome membrane biogenesis	3	0.167317	0.0403037	PEX11A, PEX19, PEX3	1462	4	16792	8.61423	1	0.904514	53.6526
GOTERM_BP_DIRECT	GO:0030947~regulation of vascular endothelial growth factor receptor signaling pathway	3	0.167317	0.0403037	VEGFC, MYOF, FZD4	1462	4	16792	8.61423	1	0.904514	53.6526
GOTERM_BP_DIRECT	GO:0097190~apoptotic signaling pathway	12	0.669269	0.0421645	ANXA6, TNFRSF6B, CASP10, CAV1, TNFRSF1B, CASP8AP2, RELT, CASP8, CD40, CASP2, CD14, SHH	1462	71	16792	1.94123	1	0.911681	55.304
GOTERM_BP_DIRECT	GO:0051439~regulation of ubiquitin-protein ligase activity involved in mitotic cell cycle	6	0.334635	0.0444385	ANAPC16, ANAPC5, CDC23, ANAPC11, UBE2D1, UBE2E1	1462	23	16792	2.99625	1	0.920102	57.2464
GOTERM_BP_DIRECT	GO:0007160~cell-matrix adhesion	14	0.780814	0.0473216	CD44, HPSE, COL13A1, ITGB1BP1, RAC1, ITGB4, PKD1, BCAM, ITGA3, ITGB1, EMP2, ADAM9, CTNNB1, VCL	1462	90	16792	1.78665	1	0.930051	59.5945
GOTERM_BP_DIRECT	GO:0045765~regulation of angiogenesis	7	0.390407	0.0479866	SFRP1, EGLN1, MAPK7, GPNMB, EMP2, EPHA2, CTNNB1	1462	31	16792	2.59353	1	0.930311	60.1184
GOTERM_BP_DIRECT	GO:0000302~response to reactive oxygen species	8	0.44618	0.0487877	CYBA, P4HB, PRDX6, PRDX2, CAT, PRDX3, SOD1, PRDX1	1462	39	16792	2.35603	1	0.931094	60.7412
GOTERM_BP_DIRECT	GO:0048704~embryonic skeletal system morphogenesis	8	0.44618	0.0487877	HOXB3, HOXB4, HOXA3, HOXB8, HOXB5, SIX1, HOXB6, FUZ	1462	39	16792	2.35603	1	0.931094	60.7412
GOTERM_BP_DIRECT	GO:0006476~protein deacetylation	4	0.22309	0.0495742	HDAC3, HDAC1, SIRT5, SIRT3	1462	10	16792	4.59425	1	0.931797	61.3435
GOTERM_BP_DIRECT	GO:0035455~response to interferon-alpha	4	0.22309	0.0495742	BST2, IFITM1, IFITM2, IFITM3	1462	10	16792	4.59425	1	0.931797	61.3435
GOTERM_BP_DIRECT	GO:0006000~fructose metabolic process	4	0.22309	0.0495742	ALDOA, PFKFB4, PFKFB3, ALDOC	1462	10	16792	4.59425	1	0.931797	61.3435

## Sheet: MIAdown Midnightblue and Greeny
Table SII.DAVID GO and KEGG analysis of the affected genes by low-concentration statins in MiaPaCa2 cells, including upregulated and downregulated genes.
Category	Term	Count	%	PValue	Genes	List Total	Pop Hits	Pop Total	Fold Enrichment	Bonferroni	Benjamini	FDR
KEGG_PATHWAY	hsa04141:Protein processing in endoplasmic reticulum	40	2.34192	1.27453e-08	HSP90AB1, SEC24B, RAD23A, RNF185, DNAJC10, DNAJB12, UBQLN1, EDEM2, PLAA, HSPH1, BAK1, UBE2D3, UBE2D2, XBP1, FBXO6, DNAJA1, HSPA5, SAR1B, DNAJC3, SAR1A, HSPA8, CUL1, SEC61A1, DNAJA2, NSFL1C, ATF6, HSPBP1, ATXN3, ATF4, SEC61B, VCP, EIF2S1, BAX, ERN1, DNAJB1, AMFR, NFE2L2, PPP1R15A, SSR3, SEL1L	608	169	6879	2.6779	3.2373e-06	3.2373e-06	1.65987e-05
KEGG_PATHWAY	hsa03050:Proteasome	16	0.936768	2.62589e-06	PSMA7, PSMF1, PSMB4, PSMB7, PSMC5, PSMB6, PSMA5, PSMC2, PSMA3, PSMB2, PSMD3, PSME3, PSMD4, PSME4, PSMD7, PSMD8	608	44	6879	4.11423	0.000666754	0.000333432	0.00341974
KEGG_PATHWAY	hsa03008:Ribosome biogenesis in eukaryotes	21	1.22951	4.9963e-05	RPP38, EIF6, NXT1, TBL3, EMG1, UTP6, NOB1, NOP10, RIOK2, CSNK2A2, SBDS, LSG1, GNL2, UTP14A, RBM28, WDR43, RPP40, POP7, XRN2, UTP14C, NMD3	608	87	6879	2.731	0.0126107	0.00422137	0.0650492
KEGG_PATHWAY	hsa03010:Ribosome	27	1.5808	0.000116017	RPL18, MRPS17, MRPS16, MRPS15, RPL19, RPL13, MRPS12, RPL36, MRPL20, MRPL10, RPS27, MRPL15, RPLP0, RPLP1, FAU, RPL10, MRPL18, RPL10A, RPS21, MRPL34, RPL36AL, MRPL2, MRPL4, MRPL3, MRPS7, MRPS2, MRPS18A	608	136	6879	2.24619	0.0290401	0.00734045	0.150988
KEGG_PATHWAY	hsa04144:Endocytosis	40	2.34192	0.00012769	RAB7A, PARD3, CLTB, LDLR, RAB5C, TSG101, CHMP4B, CHMP4A, ASAP2, VPS37A, ASAP1, PIP5K1A, CHMP2B, SH3GLB1, DNAJC6, HSPA8, EHD4, FAM21C, KIF5B, FAM21A, CBL, SMAD2, CHMP1B, ARF1, NEDD4, RAB35, IGF2R, RAB22A, RAB5A, SH3KBP1, HGS, WASL, SMURF1, PDCD6IP, RAB10, SNX12, BIN1, VPS25, SH3GL1, RNF41	608	241	6879	1.87787	0.0319149	0.00646606	0.166168
KEGG_PATHWAY	hsa03013:RNA transport	31	1.81499	0.000202144	RPP38, NXT1, ELAC2, STRAP, XPO5, EIF5, SUMO3, EIF3D, EIF3A, EIF3G, EIF3F, EIF3I, EIF1, PABPC1, KPNB1, NMD3, XPOT, NUP153, NUP88, PAIP1, ALYREF, FMR1, SAP18, EIF1B, FXR2, FXR1, EIF4G1, EIF4G3, EIF2S1, POP7, RPP40	608	172	6879	2.03918	0.0500536	0.00852176	0.26294
KEGG_PATHWAY	hsa05134:Legionellosis	13	0.761124	0.00216133	RELA, CXCL3, CYCS, CXCL2, HBS1L, NFKBIA, NFKB2, BCL2L13, VCP, ARF1, SAR1B, SAR1A, HSPA8	608	54	6879	2.72378	0.422802	0.0755073	2.77849
KEGG_PATHWAY	hsa04330:Notch signaling pathway	12	0.702576	0.0025257	DVL2, HES1, NOTCH2, CIR1, EP300, APH1A, PSEN1, DTX2, CREBBP, APH1B, PSENEN, DVL1	608	48	6879	2.82854	0.47394	0.0771536	3.23984
KEGG_PATHWAY	hsa04722:Neurotrophin signaling pathway	20	1.17096	0.00845967	IRAK2, ZNF274, BRAF, NFKBIE, NFKBIB, RELA, NFKBIA, PRKCD, MAPK1, ATF4, PSEN1, MAP3K3, PRDM4, RPS6KA2, GSK3B, BAX, RIPK2, RAP1B, NGFR, CRK	608	120	6879	1.88569	0.884432	0.213188	10.4741
KEGG_PATHWAY	hsa05110:Vibrio cholerae infection	11	0.644028	0.0140632	ATP6V0C, SEC61B, ARF1, ATP6V1E1, ATP6V1G1, ATP6V0D1, ATP6V1D, SEC61A1, ATP6V0A2, ATP6V0B, ATP6V1F	608	52	6879	2.39338	0.972605	0.302142	16.8439
KEGG_PATHWAY	hsa04721:Synaptic vesicle cycle	12	0.702576	0.0206162	ATP6V0C, STX1A, CLTB, STX3, ATP6V1E1, NAPA, ATP6V1G1, ATP6V0D1, ATP6V1D, ATP6V0A2, ATP6V0B, ATP6V1F	608	63	6879	2.15508	0.994965	0.38185	23.7612
KEGG_PATHWAY	hsa04130:SNARE interactions in vesicular transport	8	0.468384	0.026417	SNAP29, STX5, STX1A, STX4, STX3, BNIP1, GOSR2, YKT6	608	34	6879	2.66215	0.998886	0.432592	29.437
KEGG_PATHWAY	hsa04966:Collecting duct acid secretion	7	0.409836	0.0274001	ATP6V0C, ATP6V1E1, ATP6V1G1, ATP6V0D1, ATP6V1D, ATP6V0A2, ATP6V1F	608	27	6879	2.9333	0.999138	0.418897	30.3594
KEGG_PATHWAY	hsa04350:TGF-beta signaling pathway	14	0.819672	0.0315678	SMAD7, CREBBP, SMAD4, SMAD2, INHBB, MAPK1, EP300, PPP2CA, PPP2CB, TGIF1, SMURF1, MYC, CUL1, ACVR1	608	84	6879	1.88569	0.999711	0.441201	34.1473
KEGG_PATHWAY	hsa04152:AMPK signaling pathway	18	1.05386	0.0413432	IRS2, CREB3, PFKFB2, PPARG, PRKAG2, EEF2, SIRT1, CPT1A, AKT1S1, PPP2CA, PPP2CB, CREB3L2, FASN, RHEB, CAB39, MTOR, RAB10, PPP2R2C	608	123	6879	1.65573	0.999978	0.510789	42.2978
KEGG_PATHWAY	hsa03040:Spliceosome	19	1.11241	0.043675	LSM8, ALYREF, PRPF3, DDX5, PRPF18, SF3A2, SF3A1, XAB2, SF3B4, BUD31, SMNDC1, PRPF6, USP39, PQBP1, SYF2, SLU7, PHF5A, PRPF38B, HSPA8	608	133	6879	1.61631	0.999988	0.507833	44.0992
Category	Term	Count	%	PValue	Genes	List Total	Pop Hits	Pop Total	Fold Enrichment	Bonferroni	Benjamini	FDR
GOTERM_BP_DIRECT	GO:0043161~proteasome-mediated ubiquitin-dependent protein catabolic process	53	3.10304	6.67338e-13	RNF216, RNF187, RLIM, PCBP2, RMND5B, RNF38, RBCK1, PSMD3, PSMD4, PSMD7, PSMD8, CUL1, PSMD9, UBE2A, BTBD9, PSMA5, UBE2K, PSMA3, UBC, KLHL11, PSME3, NFE2L2, PSME4, UBB, RAD23A, CDC34, RFFL, PSMA7, PLAA, PSMF1, PSMB4, UBE2D3, PSMB7, PSMB6, PPP2CB, PSMB2, FBXW11, CSNK1A1, UBXN1, NSFL1C, KCTD2, SIRT1, RNF44, ATXN3, RNF6, RNF115, PSMC5, VCP, GSK3A, PSMC2, GSK3B, SMURF1, FAF1	1464	203	16792	2.99462	2.68677e-09	2.68677e-09	1.24104e-09
GOTERM_BP_DIRECT	GO:0098609~cell-cell adhesion	60	3.51288	3.05786e-11	RTN4, HSP90AB1, CAST, ZC3HAV1, CHMP4B, EIF5, H1FX, EIF2A, LARP1, SND1, BAG3, LRRC59, CLINT1, STX5, KIF5B, STK24, BAIAP2, SLC3A2, EEF2, VASP, ELMO2, MARK2, EIF4G1, DHX29, SDCBP, MAPRE1, RAB10, ERC1, DBN1, SH3GL1, SNX9, ASAP1, GIPC1, ABI1, SFN, CHMP2B, PSMB6, CDC42EP1, ATXN2L, SH3GLB1, ATIC, FASN, IDH1, EXOC3, CC2D1A, HSPA5, EMD, HSPA8, NUDC, EHD4, S100P, CBL, S100A11, MICALL1, CSNK1D, DNAJB1, AHSA…	1464	271	16792	2.53947	1.23109e-07	6.15546e-08	5.68652e-08
GOTERM_BP_DIRECT	GO:0000209~protein polyubiquitination	46	2.69321	1.26006e-10	RUSC1, CDC34, PSMA7, RLIM, PSMB4, PSMF1, ARIH1, PSMB7, UBE2D3, PSMB6, UBE2D2, PSMB2, FBXO6, RBCK1, RC3H2, ANKIB1, PSMD3, PSMD4, LONRF1, FBXW11, PSMD7, TRIP12, CUL1, RNF14, PSMD8, PSMD9, UBE2A, TNKS2, RNF114, TRIM36, PSMC5, RNF115, HUWE1, PSMA5, PSMC2, PSMA3, UBC, FBXO31, FBXL4, PSME3, PSME4, SMURF1, AMFR, UBB, CHFR, RNF41	1464	184	16792	2.86749	5.07298e-07	1.69099e-07	2.34325e-07
GOTERM_BP_DIRECT	GO:0038061~NIK/NF-kappaB signaling	24	1.40515	3.13933e-09	RELB, NFKB2, PSMA7, PSMB4, PSMF1, PSMB7, PSMB6, PSMC5, PSMA5, PSMC2, PSMA3, PSMB2, UBC, PSMD3, PSME3, PSMD4, UBB, PSME4, PPP4C, PSMD7, FBXW11, PSMD8, CUL1, PSMD9	1464	66	16792	4.17089	1.26389e-05	3.15973e-06	5.83803e-06
GOTERM_BP_DIRECT	GO:0043488~regulation of mRNA stability	30	1.75644	8.22694e-09	PSMA7, ZFP36L1, PSMF1, PSMB4, PSMB7, PSMB6, PSMB2, PSMD3, PSMD4, PABPC1, PSMD7, TNPO1, PSMD8, HSPA8, PSMD9, ZC3H14, RBM24, EXOSC4, FMR1, EXOSC1, PRKCD, EIF4G1, PSMC5, PSMA5, PSMC2, PSMA3, UBC, PSME3, PSME4, UBB	1464	103	16792	3.34076	3.31211e-05	6.62431e-06	1.52992e-05
GOTERM_BP_DIRECT	GO:0002223~stimulatory C-type lectin receptor signaling pathway	30	1.75644	1.32744e-08	NFKBIA, PSMA7, PSMF1, PSMB4, PSMB7, UBE2D2, PSMB6, PSMB2, PSMD3, PSMD4, PSMD7, FBXW11, CUL1, PSMD8, PSMD9, BCL10, RELA, CREBBP, RELB, PRKCD, TAB3, EP300, PSMC5, PSMA5, PSMC2, PSMA3, UBC, PSME3, PSME4, UBB	1464	105	16792	3.27713	5.34413e-05	8.90708e-06	2.46856e-05
GOTERM_BP_DIRECT	GO:0006521~regulation of cellular amino acid metabolic process	20	1.17096	2.08588e-08	ODC1, AZIN1, PSMA7, PSMF1, PSMB4, PSMB7, OAZ1, PSMC5, PSMB6, PSMA5, PSMC2, PSMA3, PSMB2, PSMD3, PSME3, PSMD4, PSME4, PSMD7, PSMD8, PSMD9	1464	51	16792	4.49802	8.39742e-05	1.19967e-05	3.879e-05
GOTERM_BP_DIRECT	GO:0016032~viral process	55	3.22014	1.90483e-07	TLN1, HTATIP2, RBM15B, RNF216, ANKRD17, SND1, RBCK1, RALA, ZYX, CUL1, CDK13, ATF7IP, NUP88, UBR4, UBN1, EIF4G1, MAPK1, EIF4G3, EP300, PSMA3, BIN1, CARM1, SRCAP, CRTC3, PACS2, ZMYND11, RAD23A, NFKBIA, CALCOCO2, C14ORF166, ABI1, PSMA7, KARS, ATP6V0C, PSMB4, PSMB7, VRK2, PSMB6, KLC1, PSMB2, TNPO1, HSPA8, CEBPA, NUP153, CCDC86, VAC14, CREB3, CREBBP, SIRT1, SGTA, NCKAP1, PSMC2, BAX, ATF7, C9ORF69	1464	299	16792	2.10986	0.00076659	9.58559e-05	0.000354229
GOTERM_BP_DIRECT	GO:0006511~ubiquitin-dependent protein catabolic process	39	2.28337	3.07609e-07	USP9X, RFFL, PSMA7, RLIM, CYLD, PSMF1, ARIH1, UBE2D3, UBE2D2, XBP1, SQSTM1, FBXW4, USP38, PSMD3, PSMD4, USP36, USP15, USP14, CUL1, FBXO7, USP31, PSMD9, USP40, UBE2A, NUB1, RNF6, ATXN3, VCP, UBE2K, PSMC2, PSMA3, TRPC4AP, USP20, FBXL4, UCHL3, AMFR, USP25, CHFR, USP24	1464	182	16792	2.45785	0.00123767	0.000137594	0.000572041
GOTERM_BP_DIRECT	GO:0006364~rRNA processing	41	2.40047	3.00239e-06	RPP38, RPL18, RPL19, RPL13, UTP6, NOB1, RPL36, BOP1, RIOK2, DDX27, EXOSC10, RPS27, SBDS, RPLP0, RPLP1, NPM3, FAU, RPL10, DDX21, RPL10A, RPS21, TBL3, CCDC86, EMG1, RRP36, EXOSC4, BYSL, PNO1, DIEXF, EXOSC1, RRP9, SIRT1, SENP3, CSNK1D, UTP20, UTP14A, WDR43, LTV1, XRN2, UTP14C, RPP40	1464	214	16792	2.19751	0.0120149	0.00120803	0.00558322
GOTERM_BP_DIRECT	GO:0016567~protein ubiquitination	59	3.45433	3.03241e-06	SH3RF1, RLIM, KLHL2, TRIM4, KLHL29, TRIM2, KLHL5, DCAF10, TRIM8, MED27, RNF38, KLHL21, CUL1, VCPIP1, ZC3HC1, RNF220, SOCS2, GAN, MED10, BRAP, DCAF4, KLHL18, DCAF7, MED8, NFE2L2, NEURL3, MED1, ASB6, TRIML2, XIAP, KEAP1, CDC34, CBLL1, FEM1B, TRIM11, ARIH1, UBE2D3, UBE2D2, FBXW11, RNF14, TRAF4, FBXO7, CCNB1IP1, NUB1, DTX2, TRIM28, CBL, MUL1, SIRT1, TSPAN17, ATG3, RNF44, UVSSA, VCP, NEDD4, FBXO30, TR…	1464	359	16792	1.88503	0.0121343	0.00110925	0.00563905
GOTERM_BP_DIRECT	GO:0006914~autophagy	30	1.75644	3.03304e-06	C9ORF72, CHMP4B, TSG101, ATG101, CHMP4A, RNF185, VPS37A, SESN2, CHMP2B, ANXA7, SQSTM1, SH3GLB1, XBP1, RB1CC1, VPS18, BECN1, WIPI1, TMEM208, TBC1D25, NPC1, BNIP1, VCP, MAP1S, HGS, CTSD, MTOR, DRAM1, WDR45, VPS25, RNF41	1464	133	16792	2.58721	0.0121368	0.00101707	0.00564023
GOTERM_BP_DIRECT	GO:0090263~positive regulation of canonical Wnt signaling pathway	28	1.63934	3.51045e-06	XIAP, PSMA7, PIN1, PSMF1, PSMB4, PSMB7, PSMB6, NRARP, PSMB2, PSMD3, PSMD4, FGF2, PSMD7, PSMD8, PSMD9, DVL2, RNF220, DVL1, TNKS2, PSMC5, CSNK1D, PSMA5, PSMC2, PSMA3, UBC, PSME3, PSME4, UBB	1464	120	16792	2.67632	0.0140337	0.00108657	0.00652798
GOTERM_BP_DIRECT	GO:0051437~positive regulation of ubiquitin-protein ligase activity involved in regulation of mitotic cell cycle transition	21	1.22951	5.24777e-06	FZR1, PSMA7, PSMF1, PSMB4, PSMB7, PSMC5, PSMB6, PSMA5, PSMC2, PSMA3, PSMB2, UBC, PSMD3, PSME3, PSMD4, UBB, PSME4, PSMD7, PSMD8, CUL1, PSMD9	1464	76	16792	3.16933	0.020906	0.00150797	0.00975853
GOTERM_BP_DIRECT	GO:0032436~positive regulation of proteasomal ubiquitin-dependent protein catabolic process	19	1.11241	5.56666e-06	CSNK1A1, CEBPA, GCLC, NUB1, SMAD7, TRIB3, KEAP1, DVL1, HSPBP1, ARIH1, RNF114, CSNK1D, VCP, PSEN1, ZFAND2A, GSK3B, ANKIB1, CHFR, RNF14	1464	64	16792	3.40514	0.0221622	0.00149298	0.0103515
GOTERM_BP_DIRECT	GO:0006413~translational initiation	30	1.75644	5.64555e-06	RPL18, EIF6, RPL19, RPL13, EIF5, RPL36, EIF2A, LARP1, EIF3D, RPS27, EIF3A, EIF3G, RPLP0, EIF3F, RPLP1, EIF3K, FAU, RPL10, EIF3L, EIF3I, EIF1, RPL10A, PABPC1, RPS21, PAIP1, EIF1B, EIF4G1, EIF4G3, DHX29, EIF2S1	1464	137	16792	2.51167	0.0224727	0.00141956	0.0104982
GOTERM_BP_DIRECT	GO:0000165~MAPK cascade	46	2.69321	7.77724e-06	NDST1, MAPKAPK5, MAPKAPK3, PSMA7, PAQR3, SETX, RASAL2, ZFP36L1, PEA15, PSMB4, PSMF1, PSMB7, PSMB6, MAP3K3, PSMB2, PSMD3, PSMD4, RAPGEF2, MYC, PSMD7, FGF2, PSMD8, PSMD9, IRS2, BRAF, NF1, MARK3, BRAP, RHBDD3, WDR83, MAPK1, MEF2D, PSMC5, MAPK6, EREG, PSMA5, PSMC2, PSMA3, MAPK8IP2, UBC, JAK1, PSME3, UBB, PSME4, DUSP7, SPTAN1	1464	262	16792	2.01381	0.0308262	0.00184015	0.0144619
GOTERM_BP_DIRECT	GO:0060071~Wnt signaling pathway, planar cell polarity pathway	23	1.3466	9.8189e-06	DVL2, FZD5, PSMA7, DVL1, PSMB4, PSMF1, PSMB7, PSMC5, PSMB6, PSMA5, PSMC2, PSMA3, PSMB2, UBC, PSMD3, PSME3, PSMD4, UBB, SMURF1, PSME4, PSMD7, PSMD8, PSMD9	1464	92	16792	2.86749	0.0387599	0.00219376	0.0182581
GOTERM_BP_DIRECT	GO:0031145~anaphase-promoting complex-dependent catabolic process	21	1.22951	9.90755e-06	FZR1, PSMA7, PSMB4, PSMF1, PSMB7, PSMC5, PSMB6, PSMA5, PSMC2, PSMA3, PSMB2, UBC, PSMD3, FBXO31, PSME3, PSMD4, UBB, PSME4, PSMD7, PSMD8, PSMD9	1464	79	16792	3.04897	0.0391029	0.00209717	0.0184229
GOTERM_BP_DIRECT	GO:0051436~negative regulation of ubiquitin-protein ligase activity involved in mitotic cell cycle	19	1.11241	2.66667e-05	FZR1, PSMA7, PSMF1, PSMB4, PSMB7, PSMC5, PSMB6, PSMA5, PSMC2, PSMA3, PSMB2, UBC, PSMD3, PSME3, PSMD4, UBB, PSMD7, PSMD8, PSMD9	1464	71	16792	3.06942	0.101799	0.0053537	0.049579
GOTERM_BP_DIRECT	GO:0050852~T cell receptor signaling pathway	30	1.75644	2.67316e-05	BCAR1, NFKBIA, PSMA7, PSMF1, PSMB4, PSMB7, UBE2D2, PSMB6, PSMB2, RBCK1, PSMD3, PSMD4, PSMD7, FBXW11, CUL1, PSMD8, PSMD9, BCL10, RELA, MAPK1, PSMC5, PSEN1, PSMA5, PSMC2, PSMA3, UBC, RIPK2, PSME3, PSME4, UBB	1464	148	16792	2.32499	0.102034	0.00511178	0.0496995
GOTERM_BP_DIRECT	GO:0036498~IRE1-mediated unfolded protein response	17	0.995316	3.01261e-05	TLN1, MYDGF, SRPRB, WIPI1, DNAJB9, SEC61B, XBP1, GSK3A, GFPT1, ERN1, GOSR2, HSPA5, DNAJC3, ATP6V0D1, ASNA1, SEC61A1, SERP1	1464	59	16792	3.3049	0.114222	0.00549798	0.0560089
GOTERM_BP_DIRECT	GO:0030433~ER-associated ubiquitin-dependent protein catabolic process	17	0.995316	3.77918e-05	KIAA0368, RNF185, DNAJC10, UBQLN1, EDEM2, DNAJB9, PSMC5, SEC61B, VCP, PSMC2, FBXO6, TMUB1, FAF2, HSPA5, AMFR, AUP1, SEL1L	1464	60	16792	3.24982	0.141143	0.0065935	0.0702559
GOTERM_BP_DIRECT	GO:0070126~mitochondrial translational termination	21	1.22951	3.78728e-05	MRPL2, MRPS17, MRPS16, MRPL4, MRPL3, MRPS15, AURKAIP1, MRPS23, MRPS12, MRPS7, MRRF, MRPL20, MRPL10, MRPL15, MRPS18A, MRPL49, MRPL37, MRPL18, MRPL38, MRPL34, DAP3	1464	86	16792	2.8008	0.141423	0.00633315	0.0704065
GOTERM_BP_DIRECT	GO:0070059~intrinsic apoptotic signaling pathway in response to endoplasmic reticulum stress	12	0.702576	6.74483e-05	BAK1, ATF4, CEBPB, UBE2K, XBP1, CHAC1, BAX, GSK3B, ERN1, DNAJC10, TRIB3, PPP1R15A	1464	33	16792	4.17089	0.237807	0.0108035	0.125355
GOTERM_BP_DIRECT	GO:0002479~antigen processing and presentation of exogenous peptide antigen via MHC class I, TAP-dependent	17	0.995316	7.20699e-05	PSMA7, PSMF1, PSMB4, PSMB7, PSMC5, PSMB6, PSMA5, PSMC2, PSMA3, PSMB2, PSMD3, PSME3, PSMD4, PSME4, PSMD7, PSMD8, PSMD9	1464	63	16792	3.09506	0.251859	0.0110981	0.133939
GOTERM_BP_DIRECT	GO:0006915~apoptotic process	77	4.5082	9.46174e-05	RTN4, STEAP3, SH3RF1, HTATIP2, RNF216, SMNDC1, PDCD2, CSNK2A2, UNC5B, TNIP2, CUL1, BCL7B, BCL10, OPA1, SLC25A6, PIM1, BCL2L13, PRKCD, ELMO2, NME6, MFN2, TNFRSF9, MAPK1, TRIM35, EP300, BNIP1, RIPK1, GADD45G, MAP3K10, SH3KBP1, RIPK2, PSME3, CDK11B, PDCD6IP, GADD45B, PPP1R15A, GADD45A, TRAF1, PACS2, XIAP, GULP1, MYDGF, NFKBIA, BEX2, RFFL, FEM1B, GLRX2, PLAGL1, ZFP36L1, PEA15, UBE2D3, SH3GLB1, SQSTM1…	1464	567	16792	1.55765	0.316786	0.0140101	0.175808
GOTERM_BP_DIRECT	GO:0070125~mitochondrial translational elongation	20	1.17096	0.000103954	MRPL2, MRPS17, MRPS16, MRPL4, MRPL3, MRPS15, AURKAIP1, MRPS23, MRPS12, MRPS7, MRPL20, MRPL10, MRPL15, MRPS18A, MRPL49, MRPL37, MRPL18, MRPL38, MRPL34, DAP3	1464	85	16792	2.69881	0.341993	0.0148367	0.19314
GOTERM_BP_DIRECT	GO:0043065~positive regulation of apoptotic process	47	2.75176	0.000112741	ING3, CYP1B1, APH1A, TNFRSF12A, ZMAT3, APH1B, OSGIN1, LATS1, PDCD2, BAK1, SQSTM1, HMOX1, DNAJA1, PSENEN, PHLDA3, ZNF622, ARHGEF2, KLF11, NF1, SAP18, VAV2, ARHGEF12, SIRT1, ARHGEF11, ATF6, TRIM35, ATF4, NCOA1, IRF5, PSEN1, NUPR1, RPS6KA2, BAX, RIPK1, IGF2R, GADD45G, MAP3K10, UBC, RIPK2, UBB, NGFR, FAF1, BIN1, GADD45B, APBB2, GADD45A, SLC9A1	1464	300	16792	1.79696	0.364868	0.0155306	0.209451
GOTERM_BP_DIRECT	GO:0006412~translation	41	2.40047	0.000160585	RPL18, MRPS17, MRPS16, RPL19, MRPS15, RPL13, MRPS12, CPEB4, HBS1L, RPL36, MRPL20, MRPL10, RPS27, SLC25A25, MRPL15, RPLP0, RPLP1, SLC25A3, MRPL18, MRPL37, FAU, RPL10, RPL10A, RPS21, MRPL34, RPL36AL, MRPL2, MRPL4, MRPL3, MRPS23, SLC25A6, SARS, MRPS7, MRRF, MRPS2, EIF4G1, MRPS18A, MRPL49, SLC25A38, DHPS, PELO	1464	253	16792	1.85877	0.476158	0.0213216	0.298209
GOTERM_BP_DIRECT	GO:0006446~regulation of translational initiation	12	0.702576	0.000164022	EIF4G1, EIF3D, EIF4G3, EIF3A, EIF3G, EIF5, EIF3F, EIF3K, EIF3L, EIF1, EIF3I, EIF1B	1464	36	16792	3.82332	0.483359	0.0210781	0.304582
GOTERM_BP_DIRECT	GO:0006397~mRNA processing	32	1.87354	0.00016444	AURKAIP1, RBM15B, NSRP1, SF3B4, SMNDC1, ZFP36L1, CIR1, AKAP17A, USP39, PTBP3, SCNM1, ZPR1, LSM1, RBM10, RBM28, TSEN15, ZC3H14, FMR1, AKAP8L, SAP18, PRPF3, PRPF18, SF3A2, SF3A1, SON, PAPD4, PPP1R8, LSM10, RBM39, SCAF8, XRN2, PRPF38B	1464	179	16792	2.05049	0.484227	0.0204777	0.305357
GOTERM_BP_DIRECT	GO:0006986~response to unfolded protein	13	0.761124	0.000170656	HSP90AB1, CREBRF, MFN2, HSPH1, CHAC1, FBXO6, DNAJA1, HSPA4, FAF2, DNAJB1, HERPUD2, HSPA8, DNAJB5	1464	42	16792	3.55022	0.496977	0.0206065	0.316883
GOTERM_BP_DIRECT	GO:0006950~response to stress	16	0.936768	0.000177821	HSP90AB1, CGRRF1, MAPKAPK3, SMG1, ATF6, MAPK1, NDRG4, SQSTM1, GADD45G, AKR1B1, EIF1, MTOR, GADD45B, AHSA1, GADD45A, SERP1	1464	61	16792	3.00851	0.511283	0.0208378	0.330167
GOTERM_BP_DIRECT	GO:0000226~microtubule cytoskeleton organization	17	0.995316	0.000323732	SPECC1L, MAP1B, TBCE, CAMSAP3, FER, MARK3, TACC1, TTL, MARK2, TACC2, SON, ATXN3, MAP1S, MAP2, PAFAH1B1, MAP7, ZPR1	1464	71	16792	2.74632	0.728436	0.0365594	0.600315
GOTERM_BP_DIRECT	GO:0033209~tumor necrosis factor-mediated signaling pathway	23	1.3466	0.00049712	TNFRSF12A, PSMA7, PSMB4, TNFRSF9, PSMF1, PSMB7, PSMB6, PSMC5, PSMA5, RIPK1, PSMC2, PSMA3, PSMB2, UBC, PSMD3, PSME3, PSMD4, UBB, PSME4, NGFR, PSMD7, PSMD8, PSMD9	1464	118	16792	2.23567	0.864922	0.0540905	0.920434
GOTERM_BP_DIRECT	GO:0006351~transcription, DNA-templated	211	12.3536	0.00055797	NAA15, EPC1, ZNF777, BRPF1, ZNF775, PQBP1, SAP30L, TADA2B, ZNF503, MED19, HES1, MAPK1, ZNF787, HES4, ZNF384, TGIF1, PRDM2, ATXN1L, CRTC3, ZNF79, NFKBIB, XAB2, NR1H2, PLAGL1, AHRR, ATN1, SUPT7L, ZNF398, KLF6, KLF7, ESRRA, SMAD7, SRA1, SMAD4, KLF16, ZBTB40, SMAD2, SFMBT1, ZNF585B, ZNF629, SAP130, ETS2, PPRC1, ZNF385A, CREBRF, ZBTB34, ZNF18, ZFP41, VIPAS39, ZNF296, PPARG, ZBTB39, CRCP, ZEB1, RLIM, A…	1464	1955	16792	1.23793	0.894286	0.0589229	1.03255
GOTERM_BP_DIRECT	GO:0000045~autophagosome assembly	12	0.702576	0.00057492	GABARAPL3, PACS2, PSEN1, BECN1, RB1CC1, ATG101, EMC6, UBQLN1, WIPI2, ATG3, WIPI1, WDR45	1464	41	16792	3.35706	0.901263	0.0591097	1.06376
GOTERM_BP_DIRECT	GO:0033572~transferrin transport	11	0.644028	0.000590252	ATP6V0C, STEAP3, ATP6V1E1, LMTK2, MCOLN1, ATP6V1G1, ATP6V0D1, ATP6V1D, ATP6V0A2, ATP6V0B, ATP6V1F	1464	35	16792	3.60484	0.907177	0.0591299	1.09198
GOTERM_BP_DIRECT	GO:0034976~response to endoplasmic reticulum stress	17	0.995316	0.000620461	CREBRF, DDRGK1, CEBPB, CREB3, DNAJC10, TRIB3, EEF2, UBQLN1, ATF4, XBP1, TMEM33, EIF2S1, PPP2CB, ERN1, CREB3L2, FAM129A, PPP1R15A	1464	75	16792	2.59985	0.917812	0.0605576	1.14756
GOTERM_BP_DIRECT	GO:0016192~vesicle-mediated transport	27	1.5808	0.000648419	MYO5A, STX5, SEC24B, GDI2, STX4, STX1A, VPS18, CLTB, RAB39B, AP3S2, SPIRE1, TRAPPC12, NCK2, TRAPPC11, BLZF1, CHMP1A, KXD1, ACTR1A, AP3D1, GOSR2, RAB10, SAR1B, YKT6, CLINT1, SAR1A, MON1B, MON1A	1464	152	16792	2.03742	0.926567	0.0617063	1.19897
GOTERM_BP_DIRECT	GO:0006886~intracellular protein transport	37	2.16628	0.00066388	SNX9, SEC24B, CLTB, NAPG, VIPAS39, SNX8, TIMM17B, AP3S2, DSCR3, NAPA, TBC1D16, KLC1, AP3D1, TLK1, SAR1B, TNPO1, SAR1A, KPNB1, SEC23IP, ASPSCR1, XPOT, STX5, ARHGEF2, VPS18, STX1A, STX4, STX3, IPO13, EXPH5, TBC1D22B, TBC1D25, SEC61B, TOM1L1, ARCN1, HGS, SLU7, NGFR	1464	236	16792	1.79825	0.931001	0.0616748	1.22739
GOTERM_BP_DIRECT	GO:0000122~negative regulation of transcription from RNA polymerase II promoter	89	5.21077	0.000674542	CREBRF, ZNF296, PPARG, CBX4, ZEB1, NFKB2, RLIM, ZNF205, CBX6, EPC1, WWC3, RBM10, ZNF496, MYC, AKIRIN2, ZNF281, ATF7IP, ZNF593, ZNF280C, BEND3, HIST1H1C, RELA, MTA2, RELB, TLE1, HES6, MXD1, RBBP8, HES1, EP300, NCOA2, PSEN1, UBC, TGIF1, ZNF746, UBB, ATXN1L, ZFPM1, MED1, ZMYND11, MTDH, STRAP, USP9X, PPM1A, TRIB3, ARHGAP35, NR1H2, MINA, UBE2D3, AHRR, NR1D1, ATN1, NRARP, XBP1, SQSTM1, GATAD2A, HINFP, …	1464	720	16792	1.41781	0.933902	0.0612229	1.24699
GOTERM_BP_DIRECT	GO:0038095~Fc-epsilon receptor signaling pathway	30	1.75644	0.000742551	NFKBIA, FER, PSMA7, PSMF1, PSMB4, PSMB7, UBE2D2, PSMB6, GAB2, PSMB2, PSMD3, PSMD4, PSMD7, FBXW11, PSMD8, CUL1, PSMD9, BCL10, RELA, VAV2, TAB3, MAPK1, PSMC5, PSMA5, PSMC2, PSMA3, UBC, PSME3, PSME4, UBB	1464	178	16792	1.93314	0.949744	0.0657103	1.3719
GOTERM_BP_DIRECT	GO:0032543~mitochondrial translation	11	0.644028	0.000754187	MRPL2, QRSL1, MRPS17, MRPL10, MRPS16, PTRH1, MRPS15, MRPS18A, MRPS12, MRPS7, MRPS2	1464	36	16792	3.50471	0.952045	0.0652723	1.39325
GOTERM_BP_DIRECT	GO:0036258~multivesicular body assembly	10	0.58548	0.000972322	CHMP1A, CHMP1B, TSG101, CHMP4B, CHMP4A, VPS37A, HGS, PDCD6IP, VPS25, CHMP2B	1464	31	16792	3.69998	0.980089	0.081617	1.79279
GOTERM_BP_DIRECT	GO:0016241~regulation of macroautophagy	12	0.702576	0.00109496	ATP6V0C, CAPNS1, NEDD4, SH3GLB1, EXOC8, ATP6V1E1, ERN1, ATP6V1G1, ATP6V0D1, ATP6V1D, ATP6V0A2, ATP6V0B	1464	44	16792	3.12817	0.987854	0.0895765	2.01674
GOTERM_BP_DIRECT	GO:0008380~RNA splicing	28	1.63934	0.00113903	RBM15B, RP9, NSRP1, SF3B4, CIR1, AKAP17A, PPP2CA, USP39, PTBP3, SCNM1, ZPR1, ZRSR2, LSM1, RBM10, RBM28, FMR1, AKAP8L, SAP18, PRPF3, PRPF18, SF3A2, PRPF6, SON, PPP1R8, LSM10, RBM39, SCAF8, PRPF38B	1464	166	16792	1.93469	0.98983	0.0911641	2.0971
GOTERM_BP_DIRECT	GO:0006695~cholesterol biosynthetic process	11	0.644028	0.00119473	EBP, CNBP, G6PD, SQLE, DHCR7, HMGCS1, ACLY, MVK, IDI1, NSDHL, FDFT1	1464	38	16792	3.32025	0.991875	0.0935518	2.19857
GOTERM_BP_DIRECT	GO:0030968~endoplasmic reticulum unfolded protein response	12	0.702576	0.00133683	ATF6, CTH, VCP, XBP1, AARS, CREB3L2, HSPA5, AMFR, NFE2L2, EDEM2, PPP1R15A, SERP1	1464	45	16792	3.05865	0.995418	0.102115	2.457
GOTERM_BP_DIRECT	GO:0016197~endosomal transport	15	0.87822	0.00140896	AP5Z1, ALS2, SNX9, CHMP4B, TSG101, CHMP4A, VPS37A, CHMP2B, SQSTM1, RAB35, UBC, HGS, UBB, RAB10, VPS25	1464	66	16792	2.60681	0.996574	0.105333	2.58793
GOTERM_BP_DIRECT	GO:0042787~protein ubiquitination involved in ubiquitin-dependent protein catabolic process	26	1.52225	0.00159478	FZR1, RNF185, KEAP1, RFFL, ARIH1, RMND5B, KLHL21, ANKIB1, CUL1, RNF14, TRIP12, FBXO7, HECTD1, CBL, UBR4, GAN, BTBD9, RNF115, HUWE1, AREL1, NEDD4, UBC, KLHL11, AMFR, SMURF1, UBB	1464	153	16792	1.94914	0.998381	0.116241	2.92448
GOTERM_BP_DIRECT	GO:0090383~phagosome acidification	9	0.526932	0.0016028	ATP6V0C, RAB7A, ATP6V1E1, ATP6V1G1, ATP6V0D1, ATP6V1D, ATP6V0A2, ATP6V0B, ATP6V1F	1464	27	16792	3.82332	0.998432	0.114719	2.93897
GOTERM_BP_DIRECT	GO:0007034~vacuolar transport	7	0.409836	0.00161139	CHMP1A, CHMP1B, CHMP4B, CHMP4A, NDFIP1, ATP6V0D1, CHMP2B	1464	16	16792	5.0181	0.998486	0.113288	2.9545
GOTERM_BP_DIRECT	GO:0043162~ubiquitin-dependent protein catabolic process via the multivesicular body sorting pathway	7	0.409836	0.00161139	RNF115, TOM1L1, TSG101, NEDD4, NDFIP1, VPS37A, UBAP1	1464	16	16792	5.0181	0.998486	0.113288	2.9545
GOTERM_BP_DIRECT	GO:1900034~regulation of cellular response to heat	16	0.936768	0.00180935	HSP90AB1, NUP153, NUP88, CREBBP, SIRT1, MAPK1, HSPH1, AKT1S1, EP300, BAG3, GSK3B, MTOR, DNAJB1, CHORDC1, DNAJB6, HSPA8	1464	75	16792	2.44692	0.999318	0.124154	3.31172
GOTERM_BP_DIRECT	GO:0090090~negative regulation of canonical Wnt signaling pathway	27	1.5808	0.00185232	PSMA7, LATS1, PSMF1, CYLD, PSMB4, PSMB7, PSMB6, APOE, PSMB2, PSMD3, PSMD4, PSMD7, PSMD8, PSMD9, CSNK1A1, DVL2, DVL1, PSMC5, GSK3A, PSMA5, GSK3B, PSMC2, PSMA3, UBC, PSME3, PSME4, UBB	1464	163	16792	1.89993	0.999427	0.12479	3.38909
GOTERM_BP_DIRECT	GO:0039702~viral budding via host ESCRT complex	8	0.468384	0.00198566	CHMP1A, CHMP1B, TSG101, CHMP4B, CHMP4A, VPS37A, PDCD6IP, CHMP2B	1464	22	16792	4.17089	0.999665	0.13098	3.6288
GOTERM_BP_DIRECT	GO:0016236~macroautophagy	16	0.936768	0.00207638	BECN1, ATG101, PRKAG2, UBQLN1, WIPI2, WIPI1, ATG3, MFN2, MTMR14, C6ORF106, SQSTM1, RB1CC1, UBC, RHEB, MTOR, UBB	1464	76	16792	2.41473	0.999768	0.134354	3.79159
GOTERM_BP_DIRECT	GO:0045893~positive regulation of transcription, DNA-templated	65	3.80562	0.0022911	ELF4, GPBP1, PPARG, NAA15, RNF187, ZXDA, EPC1, BRPF1, CREB3L2, TFB2M, MYC, ZNF496, FGF2, RHOG, PSMD9, ZNF281, ATF7IP, BCL10, FOXJ2, RELA, HMGA1, ARHGEF11, MAPK1, NCOA1, PSEN1, NCOA6, EDF1, FOXC1, NFE2L1, TGFB1I1, ACVR1, MED1, SUPT3H, CNBP, TFE3, PPM1A, TRIM16, NR1H2, RGMB, NR1D1, HINFP, WAC, FBXW11, RNF14, ZNF398, DVL2, KLF6, KAT8, KLF7, CREB3, TRIM28, CREBBP, SMAD4, SMAD2, SNAI1, DVL1, ATF5, RNF…	1464	515	16792	1.44766	0.999902	0.144884	4.17583
GOTERM_BP_DIRECT	GO:0045944~positive regulation of transcription from RNA polymerase II promoter	112	6.55738	0.00231973	LMO4, CASK, SETX, NLRC5, EPC1, CREB3L2, AKIRIN2, PID1, MTA2, RELA, RELB, MED10, HES1, MED19, EP300, MTF1, CAMK1, RIPK2, NFE2L1, NFE2L2, CRTC3, CAMTA2, CNBP, HAX1, TFE3, NFKBIA, C14ORF166, NR2C2, ATF1, PIN1, NR1H2, PLAGL1, AHRR, TFDP2, PLAGL2, MAFG, MAFF, ESRRA, CCPG1, SMAD7, TAF7, CREBBP, AKAP8L, SMAD4, SMAD2, TEAD3, DDX5, USF1, USF2, SREBF2, ATF6, ATF5, DLX2, NRF1, TET3, ATF4, ATF3, EBF4, ETS2, …	1464	981	16792	1.30951	0.999913	0.1443	4.22695
GOTERM_BP_DIRECT	GO:1990440~positive regulation of transcription from RNA polymerase II promoter in response to endoplasmic reticulum stress	6	0.351288	0.00234376	ATF6, ATF4, ATF3, CEBPB, XBP1, HSPA5	1464	12	16792	5.73497	0.999921	0.143473	4.26983
GOTERM_BP_DIRECT	GO:0006990~positive regulation of transcription from RNA polymerase II promoter involved in unfolded protein response	4	0.234192	0.0024682	ATF6, EP300, CREB3, XBP1	1464	4	16792	11.4699	0.999952	0.148258	4.49165
GOTERM_BP_DIRECT	GO:0006357~regulation of transcription from RNA polymerase II promoter	57	3.33724	0.00262282	HTATIP2, ZNF18, FOXK2, ZEB1, NFKB2, BUD31, ZKSCAN2, BLZF1, TRAK2, SMARCD1, MED27, NFKBIZ, ZNF354A, TADA2B, ARID5A, RELB, GMEB1, UBN1, RBBP8, MTF1, SMARCE1, MED8, NFE2L1, SRCAP, SUPT3H, ZNF274, CAMTA2, ATF1, PLAGL1, CIR1, TFDP2, CHD1, VEZF1, RNF14, ETV3, MAFG, MAFF, KLF7, BRD2, BRD3, CEBPG, SAP18, TEAD3, DDX5, USF1, FOXP4, ATF6, ATF5, NRF1, ATF4, ATF3, IRF5, NUPR1, SP2, ZBED4, PRKAR1A, CRK	1464	441	16792	1.48251	0.999974	0.154503	4.76658
GOTERM_BP_DIRECT	GO:0001731~formation of translation preinitiation complex	8	0.468384	0.00264224	EIF3D, EIF3A, EIF3G, EIF5, EIF3F, EIF3K, EIF3L, EIF3I	1464	23	16792	3.98955	0.999976	0.153321	4.80105
GOTERM_BP_DIRECT	GO:0032480~negative regulation of type I interferon production	9	0.526932	0.003341	NLRC5, TRAF3IP1, CYLD, PCBP2, UBC, RNF216, UBB, TAX1BP1, PIN1	1464	30	16792	3.44098	0.999999	0.18721	6.03378
GOTERM_BP_DIRECT	GO:0050821~protein stabilization	23	1.3466	0.00334579	HSP90AB1, TCP1, NAPG, SMAD7, FLOT2, HPS4, NAA15, ZSWIM7, MUL1, DNLZ, CCT3, CCT6A, PRKCD, PIN1, DVL1, GOLGA7, EP300, CCT4, BAG3, AAK1, TBRG1, TNIP2, SEL1L	1464	136	16792	1.93977	0.999999	0.184893	6.04217
GOTERM_BP_DIRECT	GO:0006366~transcription from RNA polymerase II promoter	64	3.74707	0.00335271	TAF1A, ELF4, LMO4, FOXK2, NFKB2, MAX, CREB3L2, DDX21, MYC, FOXJ2, RELA, GMEB1, CDK9, HMGA1, TAF10, TAF12, EP300, PRDM4, MTF1, FOXC1, NFE2L1, NFE2L2, TGFB1I1, SUPT3H, CAMTA2, POLR2J, POLR2I, POLR2C, ATF1, PLAGL1, XBP1, MLLT1, BTF3, VEZF1, PLAGL2, CEBPA, MAFG, DVL2, MAFF, TAF3, CEBPB, CREB3, CEBPG, KLF11, TAF7, SMAD4, AFF4, SMAD2, USF1, USF2, DVL1, MEF2D, DLX2, ATF5, NRF1, ATF4, ATF3, PSMC5, EBF4, …	1464	513	16792	1.43095	0.999999	0.182743	6.05429
GOTERM_BP_DIRECT	GO:0007080~mitotic metaphase plate congression	10	0.58548	0.00372997	CHMP1A, CHMP1B, BECN1, CHMP4B, CHMP4A, RRS1, PDCD6IP, KPNB1, PINX1, CHMP2B	1464	37	16792	3.09999	1	0.198483	6.71341
GOTERM_BP_DIRECT	GO:0061025~membrane fusion	11	0.644028	0.00388284	SNAP29, ANXA7, STX5, STX1A, STX4, STX3, RABIF, NAPG, NSFL1C, GOSR2, NAPA	1464	44	16792	2.86749	1	0.203076	6.97924
GOTERM_BP_DIRECT	GO:0019058~viral life cycle	9	0.526932	0.00416489	TSG101, CHMP4B, CHMP4A, UBC, VPS37A, UBB, PDCD6IP, FURIN, CHMP2B	1464	31	16792	3.32998	1	0.213404	7.46784
GOTERM_BP_DIRECT	GO:0007049~cell cycle	32	1.87354	0.00423194	STEAP3, ZMYND11, PARD3, STK10, BEX2, URGCP, PIN1, RCBTB1, CYLD, CCDC124, RB1CC1, USP39, CDC123, TLK1, CCNO, CABLES1, GPS1, SPECC1L, TXNL4B, CCPG1, PIM1, PRKCD, TACC1, GPS2, MAPK1, MAPK6, PTP4A1, CAMK1, PELO, PDCD6IP, CCNDBP1, C9ORF69	1464	217	16792	1.69142	1	0.213748	7.58363
GOTERM_BP_DIRECT	GO:0046827~positive regulation of protein export from nucleus	7	0.409836	0.00434959	ANP32B, XPO4, GSK3B, PPM1A, CAMK1, SFN, EMD	1464	19	16792	4.22577	1	0.216313	7.78647
GOTERM_BP_DIRECT	GO:0018107~peptidyl-threonine phosphorylation	10	0.58548	0.00451676	MAPK1, GSK3B, DYRK1A, MAP3K10, LMTK2, WNK1, MTOR, PRKCD, ACVR1, MARK2	1464	38	16792	3.01841	1	0.22094	8.07397
GOTERM_BP_DIRECT	GO:0045732~positive regulation of protein catabolic process	13	0.761124	0.00500523	CREBRF, RAB7A, STX5, FZR1, OAZ1, LPCAT1, VCP, NEDD4, GSK3A, GSK3B, NDFIP1, EGLN2, RHBDD3	1464	60	16792	2.48515	1	0.238904	8.90918
GOTERM_BP_DIRECT	GO:0007249~I-kappaB kinase/NF-kappaB signaling	13	0.761124	0.00500523	IRAK2, BCL10, RELB, NFKB2, TAB3, RIPK1, TICAM1, UBC, RBCK1, RIPK2, UBB, TNIP2, NKIRAS2	1464	60	16792	2.48515	1	0.238904	8.90918
GOTERM_BP_DIRECT	GO:0016579~protein deubiquitination	18	1.05386	0.00502764	USP40, USP9X, DMWD, CYLD, ATXN3, JOSD1, USP39, EIF3F, USP38, ZC3H12A, USP20, USP36, UCHL3, USP25, USP24, USP15, USP14, USP31	1464	99	16792	2.08544	1	0.237051	8.94732
GOTERM_BP_DIRECT	GO:0045727~positive regulation of translation	12	0.702576	0.00527679	EIF6, MAPK1, PAIP1, FMR1, CIRBP, EEF2, PABPC1, MTOR, FAM129A, LARP4B, SERP1, LARP1	1464	53	16792	2.59697	1	0.244421	9.37041
GOTERM_BP_DIRECT	GO:1900103~positive regulation of endoplasmic reticulum unfolded protein response	4	0.234192	0.00576991	BAK1, XBP1, BAX, ERN1	1464	5	16792	9.17596	1	0.261074	10.2023
GOTERM_BP_DIRECT	GO:1903912~negative regulation of endoplasmic reticulum stress-induced eIF2 alpha phosphorylation	4	0.234192	0.00576991	NCK2, DNAJC3, PPP1R15B, PPP1R15A	1464	5	16792	9.17596	1	0.261074	10.2023
GOTERM_BP_DIRECT	GO:0075525~viral translational termination-reinitiation	4	0.234192	0.00576991	EIF3D, EIF3A, EIF3G, EIF3L	1464	5	16792	9.17596	1	0.261074	10.2023
GOTERM_BP_DIRECT	GO:0000398~mRNA splicing, via spliceosome	32	1.87354	0.0059263	LSM8, POLR2J, POLR2I, BUD31, SF3B4, POLR2C, DGCR14, XAB2, GPKOW, CD2BP2, HNRNPF, SRRM2, PCBP2, USP39, DHX35, PABPC1, ZRSR2, HSPA8, DDX39A, TXNL4B, ALYREF, PRPF3, SF3A2, DDX5, SF3A1, PRPF6, WDR83, GTF2F1, SYF2, SLU7, PHF5A, CPSF2	1464	222	16792	1.65333	1	0.264201	10.4646
GOTERM_BP_DIRECT	GO:0032869~cellular response to insulin stimulus	15	0.87822	0.00622536	MYO5A, IRS2, GCLC, PPARG, TRIB3, FER, USF1, ZFP36L1, INHBB, CAPN10, XBP1, GSK3A, RAB10, MYC, SLC9A1	1464	77	16792	2.2344	1	0.272578	10.9642
GOTERM_BP_DIRECT	GO:0006367~transcription initiation from RNA polymerase II promoter	24	1.40515	0.00636275	ESRRA, NRBP1, TAF3, POLR2J, TRIM28, CREBBP, PPARG, TAF7, POLR2I, CDK9, TEAD3, POLR2C, NR2C2, MED10, NR1H2, NOTCH2, TAF10, TAF12, NR1D1, GTF2F1, MED8, NCOA6, MED27, MED1	1464	152	16792	1.81104	1	0.274742	11.1928
GOTERM_BP_DIRECT	GO:0070936~protein K48-linked ubiquitination	11	0.644028	0.00638347	UBE2D3, UBE2A, RNF6, UBE2D2, RNF115, UBE2K, RNF216, RNF187, RFFL, CDC34, AMFR	1464	47	16792	2.68446	1	0.272615	11.2272
GOTERM_BP_DIRECT	GO:0006355~regulation of transcription, DNA-templated	159	9.30913	0.00649672	ZNF583, RBM15B, ZXDB, CSNK2A2, KDM1B, RCBTB1, ZNF777, AKAP17A, ZNF775, SND1, RNF38, PQBP1, ZNF442, ZNF579, TFB2M, SAP30L, ZNF574, ZNF503, HES6, HES1, ZNF787, EP300, PRDM4, HES4, ZNF384, TGIF1, EDF1, PRDM2, DNTTIP2, AKAP8, ERC1, XRN2, CNBP, ZNF79, SETD1B, SETD1A, KEAP1, TRRAP, NR2C2, AHRR, ZNF425, BTF3, ZNF426, SUPT7L, RNF14, ZNF398, KAT8, ESRRA, SMAD7, CREBBP, SRA1, SMAD4, ZBTB40, SFMBT1, ZNF585B…	1464	1504	16792	1.21258	1	0.273861	11.4152
GOTERM_BP_DIRECT	GO:0008286~insulin receptor signaling pathway	15	0.87822	0.00699454	ATP6V0C, IRS2, GRB10, SOGA1, GSK3A, ATP6V1E1, BAIAP2, BCAR1, IDE, ATP6V1G1, ATP6V0D1, ATP6V1D, ATP6V0A2, ATP6V0B, ATP6V1F	1464	78	16792	2.20576	1	0.288564	12.237
GOTERM_BP_DIRECT	GO:1903543~positive regulation of exosomal secretion	6	0.351288	0.00712409	RAB7A, SDC1, TSG101, SDCBP, HGS, PDCD6IP	1464	15	16792	4.58798	1	0.290127	12.4497
GOTERM_BP_DIRECT	GO:0015031~protein transport	50	2.9274	0.00737692	RAB5C, TSG101, ZMAT3, VPS37A, TIMM50, TIMM9, NECAP2, AAGAB, SCAMP4, AP5Z1, SCAMP2, RAB39B, FAM21C, FAM21A, SPIRE1, CHMP1A, CHMP1B, RAB18, PSEN1, ARCN1, RAB5A, PDCD6IP, AKAP8, ERC1, SNX12, SERP1, UBAP1, SNAP29, RAB7A, AFTPH, EXOC8, CCDC91, CHMP2B, XBP1, LSG1, APBA3, BTF3, EXOC3, DOPEY2, EXOC2, SEC61A1, NMD3, GDI2, RABIF, TMEM115, COG5, ARF1, RAB35, RAB22A, YKT6	1464	395	16792	1.45189	1	0.295806	12.8634
GOTERM_BP_DIRECT	GO:0051603~proteolysis involved in cellular protein catabolic process	11	0.644028	0.00744839	CTSL, PSMB4, PSMB7, PSMB6, PSMA3, IDE, PSMB2, CLPP, HSPA5, DNAJC3, PSMA7	1464	48	16792	2.62853	1	0.295307	12.98
GOTERM_BP_DIRECT	GO:1901030~positive regulation of mitochondrial outer membrane permeabilization involved in apoptotic signaling pathway	5	0.29274	0.00785071	BAK1, GSK3A, BAX, GSK3B, ZNF205	1464	10	16792	5.73497	1	0.305617	13.6336
GOTERM_BP_DIRECT	GO:0007264~small GTPase mediated signal transduction	34	1.99063	0.0084519	RAB7A, RAB5C, MRAS, RRAD, ARHGAP35, HMOX1, RHOD, RAB27B, RAPGEF2, RHOF, RHOG, GDI2, RABIF, RAB39B, RALBP1, GEM, SRPRB, VAV2, SH2D3C, RAB32, ARHGAP32, RND1, RAB18, ARF1, RAB35, RAB22A, RAB5A, RHEB, ARL8A, RAP1B, TNK2, RAB10, RASD1, NKIRAS2	1464	246	16792	1.58528	1	0.321803	14.6016
GOTERM_BP_DIRECT	GO:0030512~negative regulation of transforming growth factor beta receptor signaling pathway	13	0.761124	0.00851358	SMAD7, STRAP, ZNF451, PPM1A, SMAD2, SIRT1, PIN1, XBP1, UBC, UBB, SMURF1, TGFB1I1, HSPA5	1464	64	16792	2.32983	1	0.320752	14.7004
GOTERM_BP_DIRECT	GO:0000422~mitophagy	9	0.526932	0.00910318	GABARAPL3, SQSTM1, RB1CC1, WIPI2, ATG3, WIPI1, WDR45, MARK2, FBXO7	1464	35	16792	2.94941	1	0.335739	15.6387
GOTERM_BP_DIRECT	GO:0031334~positive regulation of protein complex assembly	7	0.409836	0.00954294	CDC42EP2, VCP, ICE1, GSK3B, FAF1, FGF2, FNIP1	1464	22	16792	3.64953	1	0.345723	16.3323
GOTERM_BP_DIRECT	GO:0060999~positive regulation of dendritic spine development	7	0.409836	0.00954294	MAPK6, PSEN1, ARF1, APOE, FMR1, CAMK1, MTOR	1464	22	16792	3.64953	1	0.345723	16.3323
GOTERM_BP_DIRECT	GO:0042149~cellular response to glucose starvation	8	0.468384	0.0106128	ATF4, BECN1, XBP1, SH3GLB1, CPEB4, ZC3H12A, HSPA5, NFE2L2	1464	29	16792	3.16412	1	0.373061	17.997
GOTERM_BP_DIRECT	GO:0042254~ribosome biogenesis	9	0.526932	0.0108313	MINA, MRPL10, RPLP0, URB2, LSG1, DDX31, BOP1, ZNHIT6, GNL2	1464	36	16792	2.86749	1	0.375903	18.3332
GOTERM_BP_DIRECT	GO:0051092~positive regulation of NF-kappaB transcription factor activity	21	1.22951	0.0111785	TRAF1, IRAK2, BCL10, ARHGEF2, DDRGK1, MTDH, NFKBIB, RELA, NFKBIA, FER, NFKB2, TAB3, CTH, TRIM8, RIPK1, TICAM1, UBC, RBCK1, RIPK2, UBB, ERC1	1464	133	16792	1.81104	1	0.382125	18.8646
GOTERM_BP_DIRECT	GO:0046325~negative regulation of glucose import	5	0.29274	0.0114955	PEA15, GRB10, GSK3A, SIRT6, MYC	1464	11	16792	5.21361	1	0.387367	19.347
GOTERM_BP_DIRECT	GO:0034497~protein localization to pre-autophagosomal structure	5	0.29274	0.0114955	MFN2, PACS2, WIPI2, WIPI1, WDR45	1464	11	16792	5.21361	1	0.387367	19.347
GOTERM_BP_DIRECT	GO:1901216~positive regulation of neuron death	6	0.351288	0.0126805	APOE, AIMP2, EIF2S1, GSK3B, MTOR, ZNF746	1464	17	16792	4.04822	1	0.414442	21.1262
GOTERM_BP_DIRECT	GO:0010803~regulation of tumor necrosis factor-mediated signaling pathway	8	0.468384	0.0128259	TRAF1, CYLD, HIPK1, RIPK1, UBC, RBCK1, UBB, TAX1BP1	1464	30	16792	3.05865	1	0.41479	21.3419
GOTERM_BP_DIRECT	GO:0007179~transforming growth factor beta receptor signaling pathway	16	0.936768	0.0129475	PARD3, LTBP2, SMAD7, USP9X, CBL, SMAD4, SMAD2, FURIN, DUSP15, UBC, UBB, SMURF1, ZYX, GDF15, USP15, ACVR1	1464	92	16792	1.99477	1	0.414551	21.5218
GOTERM_BP_DIRECT	GO:0043967~histone H4 acetylation	8	0.468384	0.015352	EPC1, ING3, NCOA1, EP300, BEND3, TRIM16, TRRAP, EP400	1464	31	16792	2.95999	1	0.46696	25.0019
GOTERM_BP_DIRECT	GO:0032801~receptor catabolic process	5	0.29274	0.0160714	NEDD4, BECN1, SH3GLB1, SMURF1, KIF16B	1464	12	16792	4.77914	1	0.479148	26.0143
GOTERM_BP_DIRECT	GO:0036499~PERK-mediated unfolded protein response	5	0.29274	0.0160714	ATF4, ATF3, EIF2S1, HSPA5, NFE2L2	1464	12	16792	4.77914	1	0.479148	26.0143
GOTERM_BP_DIRECT	GO:0006414~translational elongation	6	0.351288	0.0163231	GTPBP2, EEF1B2, EEF1A1P5, HBS1L, RPLP1, EEF2	1464	18	16792	3.82332	1	0.481093	26.3655
GOTERM_BP_DIRECT	GO:0000920~cell separation after cytokinesis	6	0.351288	0.0163231	CHMP1A, CHMP1B, CHMP4B, CHMP4A, PDCD6IP, CHMP2B	1464	18	16792	3.82332	1	0.481093	26.3655
GOTERM_BP_DIRECT	GO:0031647~regulation of protein stability	13	0.761124	0.0170544	QRSL1, MAPK1, XBP1, SH3GLB1, CDKN2AIP, MUL1, DPM2, GIPC1, SUGT1, PSMD8, HSPA8, PINX1, FBXO7	1464	70	16792	2.13013	1	0.492853	27.3769
GOTERM_BP_DIRECT	GO:0030036~actin cytoskeleton organization	20	1.17096	0.0174779	SPECC1L, BCR, PHACTR4, LIMK1, MRAS, ABLIM3, NF1, SPIRE1, SLC9A3R1, PALLD, ARHGEF11, CDC42EP2, ATXN3, SDCBP, PAFAH1B1, CAP1, MKL1, ABL2, RHOG, DNAJB6	1464	130	16792	1.76461	1	0.498025	27.9565
GOTERM_BP_DIRECT	GO:0006897~endocytosis	21	1.22951	0.0176258	RAB7A, C9ORF72, SNX9, LDLR, BECN1, RALBP1, SNX8, MICALL1, NPC1, CSNK1D, AAK1, RAB22A, NECAP2, SH3KBP1, RAB5A, USP20, TNK2, BIN1, CLINT1, SH3GL1, RIN3	1464	139	16792	1.73287	1	0.497625	28.158
GOTERM_BP_DIRECT	GO:1904628~cellular response to phorbol 13-acetate 12-myristate	4	0.234192	0.0176751	ZFP36L1, RPLP0, ZC3H12A, MYC	1464	7	16792	6.55425	1	0.495291	28.2249
GOTERM_BP_DIRECT	GO:0075522~IRES-dependent viral translational initiation	4	0.234192	0.0176751	EIF3D, EIF3A, PCBP2, EIF3F	1464	7	16792	6.55425	1	0.495291	28.2249
GOTERM_BP_DIRECT	GO:0008285~negative regulation of cell proliferation	48	2.8103	0.0179994	HIST1H2AC, CYP1B1, TSG101, STRN, ABI1, ZEB1, FTH1, BAK1, TMEM127, PTGES, RBM10, RAPGEF2, FGF2, CUL1, PINX1, ETV3, B4GALT1, CEBPA, DFNA5, CGRRF1, BECN1, AIMP2, KLF11, S100A11, SMAD4, ZNF503, SMAD2, SIRT6, WNK2, FZD5, SLC9A3R1, HMGA1, TMEM115, ATF5, NOTCH2, NCK2, TNFRSF9, EREG, RPS6KA2, BTG1, BTG3, TBRG1, HGS, TGFB1I1, UTP20, EMP3, KLF4, RNF41	1464	396	16792	1.3903	1	0.498356	28.6643
GOTERM_BP_DIRECT	GO:0097352~autophagosome maturation	7	0.409836	0.0180978	SNAP29, VCP, TSG101, VIPAS39, MCOLN1, UBQLN1, WIPI2	1464	25	16792	3.21158	1	0.497011	28.7971
GOTERM_BP_DIRECT	GO:0000375~RNA splicing, via transesterification reactions	7	0.409836	0.0180978	WDR83, SLU7, PRPF3, LSM1, SF3B4, SMNDC1, PRPF6	1464	25	16792	3.21158	1	0.497011	28.7971
GOTERM_BP_DIRECT	GO:0007032~endosome organization	8	0.468384	0.0182123	PLEKHF1, ALS2, VPS18, TMEM127, EXOC8, RAB22A, ALS2CL, CHMP2B	1464	32	16792	2.86749	1	0.495997	28.9514
GOTERM_BP_DIRECT	GO:0000462~maturation of SSU-rRNA from tricistronic rRNA transcript (SSU-rRNA, 5.8S rRNA, LSU-rRNA)	8	0.468384	0.0182123	TBL3, EMG1, RRP36, BYSL, UTP6, NGDN, DIEXF, UTP20	1464	32	16792	2.86749	1	0.495997	28.9514
GOTERM_BP_DIRECT	GO:0045892~negative regulation of transcription, DNA-templated	58	3.39578	0.0205274	TSG101, RBM15B, PPARG, CBX4, ZEB1, RLIM, EPC1, DEDD2, ATF7IP, ZNF281, ZBTB21, ZNF280C, RELA, ARID5A, TLE1, HMGA1, HES1, CHMP1A, EREG, SMARCE1, MAP3K10, ZNF746, RASD1, GCLC, TRIB3, ARHGAP35, TRIM11, NR1H2, MINA, CIR1, NR1D1, TFDP2, HINFP, GATAD2A, PEX14, ZNF425, FBXW11, HSPA8, ZNF263, CEBPA, ZBTB7A, KAT8, SETDB2, CEBPB, TRIM28, TAF7, KLF11, SMAD4, SMAD2, SIRT6, SIRT1, SFMBT1, ATF5, BRMS1, PSMC5, N…	1464	499	16792	1.33318	1	0.535172	32.0032
GOTERM_BP_DIRECT	GO:0010824~regulation of centrosome duplication	6	0.351288	0.0205994	CHMP1A, CHMP1B, CHMP4B, PDCD6IP, CHORDC1, CHMP2B	1464	19	16792	3.62209	1	0.53318	32.096
GOTERM_BP_DIRECT	GO:0001701~in utero embryonic development	26	1.52225	0.0207186	GNA13, ALS2, ZFAND5, GNA12, KEAP1, OCRL, TPM1, ANKRD11, APBA3, HINFP, BTF3, MYC, SCO2, RTCB, MAFG, MAFF, UBE2A, LMX1B, SMAD4, GJB3, SMAD2, ZMIZ1, TANC2, SYF2, FOXC1, ACVR1	1464	187	16792	1.59475	1	0.532036	32.2496
GOTERM_BP_DIRECT	GO:0007015~actin filament organization	13	0.761124	0.0209952	ARHGEF2, BCAR1, CTNNA1, TPM1, WHAMM, NCK2, CDC42EP2, RND1, ARF1, FAT1, WASL, RHOF, DBN1	1464	72	16792	2.07096	1	0.533612	32.6045
GOTERM_BP_DIRECT	GO:0001732~formation of cytoplasmic translation initiation complex	3	0.175644	0.0214378	EIF3D, EIF3A, CDC123	1464	3	16792	11.4699	1	0.537957	33.1689
GOTERM_BP_DIRECT	GO:0045604~regulation of epidermal cell differentiation	3	0.175644	0.0214378	MAFG, MAFF, KEAP1	1464	3	16792	11.4699	1	0.537957	33.1689
GOTERM_BP_DIRECT	GO:0031398~positive regulation of protein ubiquitination	12	0.702576	0.0214393	HSPBP1, BCL10, XIAP, SMAD7, AIMP2, TICAM1, NDFIP1, RIPK2, HSPA5, UBB, CHFR, UBQLN1	1464	64	16792	2.15061	1	0.534844	33.1709
GOTERM_BP_DIRECT	GO:0016049~cell growth	11	0.644028	0.0215686	NOTCH2, NUPR1, NDRG4, XBP1, SLC3A2, MTOR, DDX5, EMP3, SEC61A1, XRN2, SLC9A1	1464	56	16792	2.25302	1	0.533897	33.3348
GOTERM_BP_DIRECT	GO:0000460~maturation of 5.8S rRNA	5	0.29274	0.0216421	EXOSC10, EIF6, WDR37, EXOSC4, RPF1	1464	13	16792	4.41152	1	0.532042	33.4279
GOTERM_BP_DIRECT	GO:0006612~protein targeting to membrane	7	0.409836	0.0218387	GOLGA7, PARD3, GOLGA7B, SDCBP, ATG3, RAB3IP, MICALL1	1464	26	16792	3.08806	1	0.532242	33.6763
GOTERM_BP_DIRECT	GO:0006997~nucleus organization	7	0.409836	0.0218387	CHMP1A, CHMP1B, CHMP4B, CHMP4A, PDCD6IP, BIN1, CHMP2B	1464	26	16792	3.08806	1	0.532242	33.6763
GOTERM_BP_DIRECT	GO:0006974~cellular response to DNA damage stimulus	28	1.63934	0.0236571	MICA, APLF, XIAP, ZMAT3, SETX, ZC3H12A, TLK1, WAC, MYC, TRIP12, DDX39A, TAOK1, CBL, FMR1, SMC6, ZBTB40, RAD52, SIRT1, MAPK1, PSEN1, VCP, CDKN2AIP, NCOA6, SETD7, FBXO31, PSME4, ZNF385A, PPP1R15A	1464	208	16792	1.54403	1	0.558179	35.932
GOTERM_BP_DIRECT	GO:0006457~protein folding	25	1.4637	0.0237455	HSP90AB1, TCP1, AARS, TBCE, SACS, DNLZ, DNAJC21, CCT3, CCT6A, ATF6, HSPBP1, CSNK2A2, PFDN2, CCT4, GNB2, GNB1, BAG3, PPIC, DNAJA1, DNAJB1, DNAJB6, NUDC, HSPA8, DNAJB5, DNAJA2	1464	180	16792	1.59305	1	0.556495	36.0397
GOTERM_BP_DIRECT	GO:0046330~positive regulation of JNK cascade	12	0.702576	0.0238438	ZNF622, TAOK1, RB1CC1, RIPK1, DUSP15, GADD45G, MAP3K10, SDCBP, RIPK2, GADD45B, GADD45A, TRAF4	1464	65	16792	2.11753	1	0.554987	36.1595
GOTERM_BP_DIRECT	GO:0014070~response to organic cyclic compound	10	0.58548	0.0240641	ANXA7, BAK1, G6PD, PTGES, FADS1, PSMB2, ABCC4, ACSL3, ATF1, CPT1A	1464	49	16792	2.34081	1	0.55535	36.4268
GOTERM_BP_DIRECT	GO:0007254~JNK cascade	10	0.58548	0.0240641	GPS1, IRAK2, SH2D3C, MAPK8IP2, MAP3K10, UBC, RIPK2, UBB, TAB3, GPS2	1464	49	16792	2.34081	1	0.55535	36.4268
GOTERM_BP_DIRECT	GO:0006469~negative regulation of protein kinase activity	16	0.936768	0.0241257	DBNDD2, SOCS2, NF1, TAF7, PRKAG2, RTN4R, TRIB3, SFN, CAMK2N1, DVL1, AKT1S1, PRKAR1A, MLLT1, DNAJC3, GADD45B, GADD45A	1464	99	16792	1.85373	1	0.553319	36.5015
GOTERM_BP_DIRECT	GO:0070301~cellular response to hydrogen peroxide	11	0.644028	0.0241836	LCN2, OSER1, CYP1B1, RELA, AKR1B1, ANXA1, NFE2L2, PRKCD, SIRT1, KLF4, SETX	1464	57	16792	2.2135	1	0.551254	36.5714
GOTERM_BP_DIRECT	GO:0006626~protein targeting to mitochondrion	8	0.468384	0.0250144	MFN2, SLC25A6, TIMM9, TIMM17B, TIMM10, TIMM23, TIMM44, FBXO7	1464	34	16792	2.69881	1	0.560665	37.5682
GOTERM_BP_DIRECT	GO:0001889~liver development	13	0.761124	0.0255735	CEBPA, RELA, CEBPG, NF1, QDPR, HMGCS1, RHBDD3, HES1, PHF2, XBP1, IGF2R, RB1CC1, MED1	1464	74	16792	2.01499	1	0.565859	38.2307
GOTERM_BP_DIRECT	GO:1904871~positive regulation of protein localization to Cajal body	4	0.234192	0.0264704	TCP1, CCT4, CCT3, CCT6A	1464	8	16792	5.73497	1	0.575646	39.2794
GOTERM_BP_DIRECT	GO:0071499~cellular response to laminar fluid shear stress	4	0.234192	0.0264704	XBP1, NFE2L2, KLF4, SREBF2	1464	8	16792	5.73497	1	0.575646	39.2794
GOTERM_BP_DIRECT	GO:0006987~activation of signaling protein activity involved in unfolded protein response	4	0.234192	0.0264704	BAK1, BAX, ERN1, HSPA5	1464	8	16792	5.73497	1	0.575646	39.2794
GOTERM_BP_DIRECT	GO:1903071~positive regulation of ER-associated ubiquitin-dependent protein catabolic process	4	0.234192	0.0264704	XBP1, NFE2L2, UBQLN1, SGTA	1464	8	16792	5.73497	1	0.575646	39.2794
GOTERM_BP_DIRECT	GO:0051865~protein autoubiquitination	10	0.58548	0.0271548	UBE2D3, UBE2A, UBE2D2, RNF115, RNF220, RNF185, RNF187, AMFR, CNOT4, RNF41	1464	50	16792	2.29399	1	0.582191	40.0683
GOTERM_BP_DIRECT	GO:1901673~regulation of mitotic spindle assembly	5	0.29274	0.0282542	CHMP1A, CHMP1B, CHMP4B, PDCD6IP, CHMP2B	1464	14	16792	4.09641	1	0.594032	41.3154
GOTERM_BP_DIRECT	GO:0035729~cellular response to hepatocyte growth factor stimulus	5	0.29274	0.0282542	GCLC, RELA, GSK3B, BCAR1, MED1	1464	14	16792	4.09641	1	0.594032	41.3154
GOTERM_BP_DIRECT	GO:0042176~regulation of protein catabolic process	5	0.29274	0.0282542	ODC1, HGS, PSMD3, FAF1, FURIN	1464	14	16792	4.09641	1	0.594032	41.3154
GOTERM_BP_DIRECT	GO:0071044~histone mRNA catabolic process	5	0.29274	0.0282542	EXOSC10, PAPD4, EXOSC4, LSM1, ZCCHC6	1464	14	16792	4.09641	1	0.594032	41.3154
GOTERM_BP_DIRECT	GO:0030970~retrograde protein transport, ER to cytosol	5	0.29274	0.0282542	SEC61B, VCP, FAF2, SEL1L, AUP1	1464	14	16792	4.09641	1	0.594032	41.3154
GOTERM_BP_DIRECT	GO:0000184~nuclear-transcribed mRNA catabolic process, nonsense-mediated decay	18	1.05386	0.0288682	RPL18, RPL19, SMG5, RPL13, SMG1, RPL36, ETF1, EXOSC10, EIF4G1, RPS27, PPP2CA, RPLP0, RPLP1, RPL10, FAU, PABPC1, RPL10A, RPS21	1464	119	16792	1.73495	1	0.59917	42.0012
GOTERM_BP_DIRECT	GO:0043966~histone H3 acetylation	9	0.526932	0.0302769	TAF10, SUPT3H, BRPF1, JADE3, TAF12, SAP130, DR1, SUPT7L, TRIM16	1464	43	16792	2.40069	1	0.614086	43.5459
GOTERM_BP_DIRECT	GO:0042542~response to hydrogen peroxide	10	0.58548	0.0305146	BAK1, SDC1, STK24, HMOX1, PPP2CB, EEF2, KPNA4, PPP1R15B, SIRT1, GLRX2	1464	51	16792	2.24901	1	0.614188	43.8027
GOTERM_BP_DIRECT	GO:0010033~response to organic substance	7	0.409836	0.0308072	S100P, SQLE, PPP2CA, RELA, ANXA5, GART, GLRX2	1464	28	16792	2.86749	1	0.614956	44.1173
GOTERM_BP_DIRECT	GO:0061418~regulation of transcription from RNA polymerase II promoter in response to hypoxia	7	0.409836	0.0308072	UBE2D3, UBE2D2, EP300, CREBBP, UBC, EGLN2, UBB	1464	28	16792	2.86749	1	0.614956	44.1173
GOTERM_BP_DIRECT	GO:0048844~artery morphogenesis	6	0.351288	0.0311899	HES1, SMAD7, APOE, ZMIZ1, NF1, FOXC1	1464	21	16792	3.27713	1	0.616792	44.5262
GOTERM_BP_DIRECT	GO:0007005~mitochondrion organization	13	0.761124	0.0337485	CEBPA, EIF4G1, RAB32, NRF1, ESRRA, OPA1, HAX1, CYCS, PPRC1, TFB2M, TMEM11, YME1L1, MTFR1	1464	77	16792	1.93648	1	0.643518	47.1883
GOTERM_BP_DIRECT	GO:0034644~cellular response to UV	9	0.526932	0.0342803	BAK1, ATF4, EP300, NEDD4, EIF2S1, BAX, FMR1, CREBBP, MYC	1464	44	16792	2.34613	1	0.646633	47.7262
GOTERM_BP_DIRECT	GO:1903955~positive regulation of protein targeting to mitochondrion	14	0.819672	0.0347699	ABLIM3, HPS4, FZD5, SREBF2, CSNK2A2, HES1, PSMB7, UBE2D3, HUWE1, GSK3A, SH3GLB1, USP36, PSMD8, PLAGL2	1464	86	16792	1.8672	1	0.649225	48.2168
GOTERM_BP_DIRECT	GO:0000470~maturation of LSU-rRNA	5	0.29274	0.0359379	EIF6, WDR37, NOP2, RPL10A, RPF1	1464	15	16792	3.82332	1	0.658889	49.3698
GOTERM_BP_DIRECT	GO:1904874~positive regulation of telomerase RNA localization to Cajal body	5	0.29274	0.0359379	TCP1, CCT4, CCT3, CCT6A, NOP10	1464	15	16792	3.82332	1	0.658889	49.3698
GOTERM_BP_DIRECT	GO:0007163~establishment or maintenance of cell polarity	7	0.409836	0.0360753	ACTR3, PARD3, FAT1, MAP7, CAP1, CTNNA1, CDC42BPB	1464	29	16792	2.76861	1	0.657647	49.5038
GOTERM_BP_DIRECT	GO:2000188~regulation of cholesterol homeostasis	4	0.234192	0.0371774	NR1H2, NR1D1, LDLR, SREBF2	1464	9	16792	5.09775	1	0.66624	50.5667
GOTERM_BP_DIRECT	GO:0006596~polyamine biosynthetic process	4	0.234192	0.0371774	SAT1, ODC1, OAZ1, AZIN1	1464	9	16792	5.09775	1	0.66624	50.5667
GOTERM_BP_DIRECT	GO:0015825~L-serine transport	4	0.234192	0.0371774	SLC1A4, SERINC2, SERINC5, SLC38A7	1464	9	16792	5.09775	1	0.66624	50.5667
GOTERM_BP_DIRECT	GO:0007050~cell cycle arrest	20	1.17096	0.0371845	CGRRF1, TSG101, AK1, PRKAG2, PPM1A, MFN2, PLAGL1, NOTCH2, PPM1G, TBRG1, CDC123, ERN1, RHEB, CAB39, MTOR, APBB2, MYC, PPP1R15A, GADD45A, CUL1	1464	141	16792	1.62694	1	0.663685	50.5735
GOTERM_BP_DIRECT	GO:1904886~beta-catenin destruction complex disassembly	6	0.351288	0.0375567	CSNK1A1, DVL2, GSK3B, FRAT2, FZD5, DVL1	1464	22	16792	3.12817	1	0.664797	50.9276
GOTERM_BP_DIRECT	GO:0019086~late viral transcription	3	0.175644	0.0404074	USF1, MON1B, USF2	1464	4	16792	8.60246	1	0.689454	53.5613
GOTERM_BP_DIRECT	GO:1903553~positive regulation of extracellular exosome assembly	3	0.175644	0.0404074	SDC1, SDCBP, PDCD6IP	1464	4	16792	8.60246	1	0.689454	53.5613
GOTERM_BP_DIRECT	GO:0010499~proteasomal ubiquitin-independent protein catabolic process	3	0.175644	0.0404074	KEAP1, PSME4, NFE2L2	1464	4	16792	8.60246	1	0.689454	53.5613
GOTERM_BP_DIRECT	GO:2000301~negative regulation of synaptic vesicle exocytosis	3	0.175644	0.0404074	BRAF, FMR1, RAP1B	1464	4	16792	8.60246	1	0.689454	53.5613
GOTERM_BP_DIRECT	GO:0006977~DNA damage response, signal transduction by p53 class mediator resulting in cell cycle arrest	11	0.644028	0.0407361	PLAGL1, EP300, BAX, TFDP2, UBC, UBB, SFN, CARM1, GADD45A, ZNF385A, CNOT4	1464	62	16792	2.03499	1	0.68991	53.8562
GOTERM_BP_DIRECT	GO:0007219~Notch signaling pathway	17	0.995316	0.0411219	CEBPA, APH1A, CHAC1, DTX2, CREBBP, APH1B, HES1, NOTCH2, EP300, PSEN1, NRARP, UBC, FOXC1, PSENEN, UBB, MYC, SEL1L	1464	115	16792	1.69556	1	0.690875	54.2002
GOTERM_BP_DIRECT	GO:0006396~RNA processing	15	0.87822	0.0412626	CCNL1, NUFIP1, SF3A1, SETX, EXOSC10, LARP6, DHX29, HNRNPF, DHX34, DHX33, DHX35, RBM39, DEDD2, XRN2, RTCA	1464	97	16792	1.7737	1	0.689628	54.3249
GOTERM_BP_DIRECT	GO:2001237~negative regulation of extrinsic apoptotic signaling pathway	8	0.468384	0.043414	ZMYND11, SH3RF1, GCLC, RELA, RB1CC1, RIPK1, PSME3, ACVR1	1464	38	16792	2.41473	1	0.705925	56.1938
GOTERM_BP_DIRECT	GO:0000381~regulation of alternative mRNA splicing, via spliceosome	8	0.468384	0.043414	RBM15B, FMR1, DYRK1A, SAP18, DDX5, NSRP1, RBM10, SF3A1	1464	38	16792	2.41473	1	0.705925	56.1938
GOTERM_BP_DIRECT	GO:0016477~cell migration	23	1.3466	0.0439079	BCAR1, ARHGAP35, PIP5K1A, VAV2, PALLD, SNAI1, ELMO2, SDC2, HES1, NCK2, SDC1, BTG1, GSK3B, FAT1, SH3KBP1, ZRANB1, JAK1, FOXC1, TNK2, USP24, ABL2, SLC9A1, CDC42BPB	1464	172	16792	1.53377	1	0.707631	56.6125
GOTERM_BP_DIRECT	GO:0046777~protein autophosphorylation	23	1.3466	0.0439079	BCR, STK24, STK10, MAPKAPK5, TRIM28, MAPKAPK3, PIM1, WNK1, SMG1, FER, WNK2, MARK2, VRK2, MAP3K3, EIF2S1, GSK3B, AAK1, RIPK1, DYRK1A, ERN1, LMTK2, MAP3K10, MTOR	1464	172	16792	1.53377	1	0.707631	56.6125
GOTERM_BP_DIRECT	GO:0016239~positive regulation of macroautophagy	6	0.351288	0.0446617	SQSTM1, HMOX1, WAC, SESN2, SIRT1, LARP1	1464	23	16792	2.99216	1	0.71145	57.2443
GOTERM_BP_DIRECT	GO:0044804~nucleophagy	5	0.29274	0.0447073	BECN1, WIPI2, ATG3, WIPI1, WDR45	1464	16	16792	3.58436	1	0.709407	57.2822
GOTERM_BP_DIRECT	GO:0035855~megakaryocyte development	5	0.29274	0.0447073	EP300, ABI1, ZFPM1, ZNF385A, MED1	1464	16	16792	3.58436	1	0.709407	57.2822
GOTERM_BP_DIRECT	GO:1901800~positive regulation of proteasomal protein catabolic process	5	0.29274	0.0447073	DDRGK1, PSMC5, XBP1, PSMC2, FMR1	1464	16	16792	3.58436	1	0.709407	57.2822
GOTERM_BP_DIRECT	GO:1900745~positive regulation of p38MAPK cascade	5	0.29274	0.0447073	MAP3K3, GADD45G, ZC3H12A, GADD45B, GADD45A	1464	16	16792	3.58436	1	0.709407	57.2822
GOTERM_BP_DIRECT	GO:0090502~RNA phosphodiester bond hydrolysis, endonucleolytic	10	0.58548	0.0468306	ZC3H3, RPP38, RNASEK, NOB1, ERN1, ZC3H12A, RNASEH1, RPP40, POP7, TSEN15	1464	55	16792	2.08544	1	0.72399	59.0138
GOTERM_BP_DIRECT	GO:0048147~negative regulation of fibroblast proliferation	7	0.409836	0.0482562	NUPR1, BAX, NF1, C1QL4, EMD, MYC, FTH1	1464	31	16792	2.58999	1	0.732517	60.1389
GOTERM_BP_DIRECT	GO:0034063~stress granule assembly	4	0.234192	0.0497459	OGFOD1, ATXN2L, PQBP1, CIRBP	1464	10	16792	4.58798	1	0.741152	61.2833
GOTERM_BP_DIRECT	GO:0010762~regulation of fibroblast migration	4	0.234192	0.0497459	MTA2, GNA12, RFFL, FER	1464	10	16792	4.58798	1	0.741152	61.2833
